# Supplementary material
Source: publisher figshare collection journal article supplement (https://gsapubs.figshare.com/ndownloader/files/22409490)
Supplement: Supplementary file 1 [file 22409490]

Copeland, P., Bertrand, G., France-Lanord, C., and Sundell, K., 2015, 40Ar/39Ar ages of muscovites from modern Himalayan rivers: Himalayan evolution and the relative contribution of tectonics and climate: Geosphere, v. 11, doi:10.1130/GES01154.1.

**Supplemental File**

**Part 1: Results of 40Ar/39Ar analysis**

*List of tables in the Supplemental File*

**Table**

A1 irradiation details

**Table sample type of analysis grain size (µm)**

A2 MO-50 single crystal > 333

A3 MO-81 single crystal > 333

A4 MO-139 single crystal > 333

A5 MO-217 single crystal > 333

A6 Guy-2 single crystal > 333

A7 NAG-12 single crystal > 333

A8 Step heating data

**Table A1 irradiation details**

Samples in this study were irradiated in four separate batches. Sample GUY-2 was irradiated in Irradiation #22. Samples MO-9, MO-15, and MO-29 were irradiated in Irradiation #27. Sample MO-82 was irradiated in Iradiation #29. All other samples were irradiated in Irradiation #31. Correction factors for these irradiations are as follows:

| **Irradiation #** | **(40Ar/39Ar)K** | **(39Ar/37Ar)Ca** | **(36Ar/37Ar)Ca** |
| --- | --- | --- | --- |
| 22 | 0.0334±9 | 0.00178±13 | 0.000218±3 |
| 27 | 0.0495±9 | 0.000669±7 | 0.000268±4 |
| 29 | 0.0200±3 | 0.000690±9 | 0.000198±7 |
| 31 | 0.0143±1 | 0.001411±18 | 0.000341±7 |

**Table A2** Single crystal data, MO-50

| **Run ID** | **36/39 Cor** | **37/39 Cor** | **38/39 Cor** | **40/39 Cor** | **40*/39** | **%40*** | **Age** | **± 1 sigma** |
| --- | --- | --- | --- | --- | --- | --- | --- | --- |
| 31/1/09-01 | 0.00003 | 0.01741 | 0.01319 | 1.48367 | 1.46244 | 99.5 | 7.11 | 1.06 |
| 31/1/09-02 | 0.00018 | 0.00459 | 0.01164 | 1.67565 | 1.60788 | 96.8 | 7.82 | 0.69 |
| 31/1/09-03 | 0.00000 | 0.00615 | 0.01033 | 1.83140 | 1.81691 | 100.0 | 8.83 | 0.70 |
| 31/1/09-04 | 0.00005 | 0.01111 | 0.01172 | 1.44401 | 1.41735 | 99.1 | 6.89 | 0.40 |
| 31/1/09-05 | 0.01307 | 0.01287 | 0.02173 | 4.99165 | 1.11694 | 22.4 | 5.43 | 4.54 |
| 31/1/09-06 | 0.00915 | 0.00793 | 0.01581 | 5.83237 | 3.11388 | 53.5 | 15.10 | 1.28 |
| 31/1/09-07 | 0.00005 | 0.00386 | 0.01188 | 1.79621 | 1.76876 | 99.3 | 8.60 | 0.47 |
| 31/1/09-08 | 0.00635 | 0.02571 | 0.01624 | 2.55135 | 0.66326 | 26.1 | 3.23 | 1.27 |
| 31/1/09-09 | 0.00330 | 0.00587 | 0.01487 | 1.77770 | 0.78799 | 44.7 | 3.83 | 0.65 |
| 31/1/09-10 | 0.00129 | 0.01853 | 0.01219 | 1.73764 | 1.34333 | 77.9 | 6.53 | 0.36 |
| 31/1/09-11 | 0.00152 | 0.00375 | 0.01347 | 1.86435 | 1.40113 | 75.7 | 6.81 | 0.34 |
| 31/1/09-12 | 0.00004 | 0.00873 | 0.01416 | 3.40196 | 3.37785 | 99.7 | 16.38 | 0.54 |
| 31/1/09-13 | 0.00000 | 0.00416 | 0.01425 | 2.28062 | 2.26589 | 100.0 | 11.00 | 0.80 |
| 31/1/09-14 | 0.00165 | 0.00266 | 0.01426 | 2.10903 | 1.60738 | 76.7 | 7.81 | 0.26 |
| 31/1/09-15 | 0.00119 | 0.00353 | 0.01528 | 2.20575 | 1.84152 | 84.0 | 8.95 | 0.30 |
| 31/1/09-16 | 0.00562 | 0.02063 | 0.01402 | 2.47033 | 0.79831 | 32.5 | 3.88 | 0.61 |
| 31/1/09-17 | 0.00582 | 0.00552 | 0.01785 | 3.83025 | 2.09674 | 54.9 | 10.18 | 0.95 |
| 31/1/09-18 | 0.00223 | 0.00107 | 0.01522 | 1.92481 | 1.25071 | 65.5 | 6.08 | 0.44 |
| 31/1/09-19 | 0.00002 | 0.00408 | 0.01392 | 1.84880 | 1.82827 | 99.7 | 8.88 | 0.45 |
| 31/1/09-20 | 0.00055 | 0.00782 | 0.01367 | 2.16116 | 1.98403 | 92.4 | 9.64 | 0.52 |
| 31/1/09-21 | 0.00023 | 0.00067 | 0.01170 | 3.11612 | 3.03343 | 97.8 | 14.72 | 1.73 |
| 31/1/09-22 | 0.00007 | 0.00210 | 0.01232 | 2.35331 | 2.31868 | 99.1 | 11.26 | 0.54 |
| 31/1/09-23 | 0.00005 | 0.00517 | 0.01154 | 2.70356 | 2.67601 | 99.5 | 12.99 | 1.27 |
| 31/1/09-24 | 0.00072 | 0.00349 | 0.01627 | 2.91707 | 2.68919 | 92.6 | 13.05 | 0.58 |
| 31/1/09-25 | 0.00200 | 0.00244 | 0.01608 | 2.09355 | 1.48811 | 71.6 | 7.23 | 0.89 |
| 31/1/09-26 | 0.00205 | 0.01018 | 0.01375 | 3.46537 | 2.84636 | 82.5 | 13.81 | 1.10 |
| 31/1/09-27 | 0.00479 | 0.00674 | 0.01598 | 2.46494 | 1.03736 | 42.3 | 5.05 | 0.57 |
| 31/1/09-28 | 0.00941 | 0.01692 | 0.01617 | 3.47950 | 0.68675 | 19.8 | 3.34 | 1.10 |
| 31/1/09-29 | 0.00197 | 0.00364 | 0.01379 | 2.41523 | 1.81983 | 75.8 | 8.84 | 0.87 |
| 31/1/09-30 | 0.00110 | 0.00333 | 0.01415 | 2.27504 | 1.93528 | 85.6 | 9.40 | 0.55 |
| 31/1/09-31 | 0.00482 | 0.00312 | 0.01531 | 2.21661 | 0.77778 | 35.3 | 3.78 | 0.85 |
| 31/1/09-32 | 0.00120 | 0.00377 | 0.01500 | 1.89203 | 1.52400 | 81.2 | 7.41 | 0.46 |
| 31/1/09-33 | 0.00117 | 0.00674 | 0.01373 | 2.40727 | 2.04938 | 85.6 | 9.96 | 0.50 |
| 31/1/09-34 | 0.00404 | 0.00804 | 0.01477 | 4.34884 | 3.14028 | 72.4 | 15.23 | 0.77 |
| 31/1/09-35 | 0.00784 | 0.01481 | 0.01440 | 3.03114 | 0.70048 | 23.2 | 3.41 | 0.99 |
| 31/1/09-36 | 0.00342 | 0.00968 | 0.01474 | 1.79350 | 0.76945 | 43.2 | 3.74 | 1.05 |
| 31/1/09-37 | 0.00044 | 0.00161 | 0.01406 | 2.05653 | 1.91142 | 93.6 | 9.29 | 0.39 |
| 31/1/09-38 | 0.00246 | 0.01346 | 0.01105 | 1.90025 | 1.16052 | 61.5 | 5.64 | 1.24 |
| 31/1/09-39 | 0.00529 | 0.01205 | 0.01612 | 1.87033 | 0.29516 | 15.9 | 1.44 | 0.94 |
| 31/1/09-40 | 0.00618 | 0.01691 | 0.01350 | 2.27420 | 0.43507 | 19.3 | 2.12 | 1.24 |
| 31/1/09-41 | 0.00293 | 0.00300 | 0.01365 | 1.51772 | 0.63800 | 42.4 | 3.11 | 0.81 |
| 31/1/09-42 | 0.00280 | 0.00423 | 0.01328 | 2.51725 | 1.67572 | 67.0 | 8.14 | 0.63 |
| 31/1/09-43 | 0.00290 | 0.02186 | 0.01364 | 1.88534 | 1.01646 | 54.3 | 4.94 | 0.38 |
| 31/1/09-44 | 0.00128 | 0.01209 | 0.01540 | 2.35636 | 1.96536 | 83.9 | 9.55 | 1.06 |
| 31/1/09-45 | 0.00156 | 0.00203 | 0.01413 | 2.74199 | 2.26809 | 83.2 | 11.01 | 0.34 |
| 31/1/09-46 | 0.00269 | 0.00714 | 0.01443 | 2.56884 | 1.76086 | 68.9 | 8.56 | 0.51 |
| 31/1/09-47 | 0.00140 | 0.00665 | 0.01408 | 1.82973 | 1.40273 | 77.3 | 6.82 | 0.31 |
| 31/1/09-48 | 0.00189 | 0.00710 | 0.01290 | 1.95127 | 1.37961 | 71.2 | 6.71 | 0.38 |
| 31/1/09-49 | 0.00249 | 0.00159 | 0.01467 | 2.10060 | 1.35148 | 64.8 | 6.57 | 0.53 |
| 31/1/09-50 | 0.00183 | -0.00209 | 0.01316 | 3.09247 | 2.53858 | 82.5 | 12.32 | 0.56 |
| 31/1/09-51 | 0.00136 | 0.00536 | 0.01302 | 2.13111 | 1.71582 | 81.1 | 8.34 | 0.49 |
| 31/1/09-52 | 0.00281 | 0.00581 | 0.01356 | 2.15801 | 1.31516 | 61.4 | 6.39 | 0.84 |
| 31/1/09-53 | 0.00004 | 0.00348 | 0.01804 | 2.18919 | 2.16466 | 99.5 | 10.51 | 0.57 |
| 31/1/09-54 | 0.00032 | 0.00655 | 0.01512 | 2.19902 | 2.09004 | 95.7 | 10.15 | 0.68 |
| 31/1/09-55 | 0.00018 | 0.00435 | 0.01402 | 2.28633 | 2.21804 | 97.6 | 10.77 | 0.30 |
| 31/1/09-56 | 0.00002 | 0.02155 | 0.01272 | 2.90966 | 2.89258 | 99.9 | 14.04 | 0.69 |
| 31/1/09-57 | 0.00331 | 0.00025 | 0.01599 | 2.41619 | 1.42445 | 59.3 | 6.93 | 0.48 |
| 31/1/09-58 | 0.00106 | 0.00225 | 0.01345 | 2.23744 | 1.91085 | 86.0 | 9.28 | 1.27 |
| 31/1/09-59 | 0.00343 | 0.00084 | 0.01431 | 2.71613 | 1.68895 | 62.5 | 8.21 | 1.33 |
| 31/1/09-60 | 0.00163 | 0.00081 | 0.01484 | 1.97902 | 1.48229 | 75.4 | 7.21 | 0.55 |
| 31/1/09-61 | 0.01102 | -0.00429 | 0.01618 | 4.71045 | 1.44017 | 30.7 | 7.00 | 1.29 |
| 31/1/09-62 | 0.01270 | -0.00477 | 0.01855 | 4.62578 | 0.85847 | 18.6 | 4.18 | 1.92 |
| 31/1/09-63 | 0.00397 | -0.00111 | 0.01419 | 2.92182 | 1.73537 | 59.7 | 8.43 | 0.47 |
| 31/1/09-64 | 0.00160 | 0.00175 | 0.01540 | 2.69707 | 2.21001 | 82.4 | 10.73 | 0.55 |
| 31/1/09-65 | 0.00276 | 0.00117 | 0.01391 | 2.15819 | 1.32726 | 61.9 | 6.45 | 0.54 |
| 31/1/09-66 | 0.00042 | 0.00084 | 0.01324 | 2.69822 | 2.55909 | 95.3 | 12.42 | 0.42 |
| 31/1/09-67 | 0.00203 | 0.00323 | 0.01376 | 2.23097 | 1.61721 | 73.0 | 7.86 | 0.50 |
| 31/1/09-68 | 0.00338 | 0.01026 | 0.01516 | 2.38772 | 1.37668 | 58.0 | 6.69 | 0.67 |
| 31/1/09-69 | 0.00309 | 0.00296 | 0.01425 | 2.79432 | 1.86860 | 67.2 | 9.08 | 0.31 |
| 31/1/09-70 | 0.00289 | 0.00325 | 0.01563 | 2.66631 | 1.79872 | 67.8 | 8.74 | 0.44 |
| 31/1/09-71 | 0.00075 | 0.00850 | 0.01390 | 2.31208 | 2.07618 | 90.4 | 10.08 | 0.58 |
| 31/1/09-72 | 0.00005 | 0.00587 | 0.01208 | 2.41450 | 2.38728 | 99.5 | 11.59 | 0.47 |
| 31/1/09-73 | 0.00188 | 0.00004 | 0.01311 | 1.81607 | 1.24484 | 69.1 | 6.05 | 0.38 |
| 31/1/09-74 | 0.00002 | 0.00092 | 0.01429 | 1.88102 | 1.86002 | 99.6 | 9.04 | 0.47 |
| 31/1/09-75 | 0.00001 | 0.00822 | 0.01598 | 3.08170 | 3.06624 | 100.0 | 14.87 | 0.87 |
| 31/1/09-76 | 0.00005 | 0.00206 | 0.01511 | 2.32697 | 2.29730 | 99.3 | 11.16 | 0.34 |
| 31/1/09-77 | 0.00031 | 0.00327 | 0.01399 | 2.09294 | 1.98872 | 95.7 | 9.66 | 0.35 |
| 31/1/09-78 | 0.00013 | 0.00618 | 0.01446 | 2.04139 | 1.98852 | 98.1 | 9.66 | 0.59 |
| 31/1/09-79 | 0.00093 | 0.00493 | 0.01413 | 3.07274 | 2.78321 | 91.0 | 13.51 | 0.70 |
| 31/1/09-80 | 0.00104 | 0.01115 | 0.01404 | 2.03921 | 1.71899 | 84.9 | 8.35 | 0.50 |
| 31/1/09-81 | 0.00461 | 0.02226 | 0.01287 | 2.34776 | 0.97206 | 41.7 | 4.73 | 0.73 |
| 31/1/09-82 | 0.00002 | 0.00300 | 0.01273 | 1.32022 | 1.29991 | 99.5 | 6.32 | 0.25 |
| 31/1/09-83 | 0.00022 | 0.00373 | 0.01283 | 2.44676 | 2.36847 | 97.4 | 11.50 | 0.41 |
| 31/1/09-84 | 0.00019 | 0.00486 | 0.01349 | 1.80808 | 1.73702 | 96.8 | 8.44 | 1.78 |
| 31/1/09-85 | 0.00188 | 0.00425 | 0.01337 | 2.44419 | 1.87429 | 77.1 | 9.11 | 0.32 |
| 31/1/09-86 | 0.00102 | -0.00487 | 0.01479 | 2.35710 | 2.04095 | 87.1 | 9.91 | 0.80 |
| 31/1/09-87 | 0.00022 | -0.01377 | 0.01547 | 2.60586 | 2.52638 | 97.5 | 12.26 | 1.10 |
| 31/1/09-88 | 0.00001 | 0.00005 | 0.01502 | 1.63162 | 1.61328 | 99.8 | 7.84 | 0.58 |
| 31/1/09-89 | 0.00000 | 0.00005 | 0.01311 | 2.15348 | 2.13798 | 99.9 | 10.38 | 0.65 |
| 31/1/09-90 | 0.00070 | 0.00291 | 0.01539 | 3.50482 | 3.28393 | 94.1 | 15.93 | 0.65 |
| 31/1/09-91 | 0.00102 | 0.00074 | 0.01557 | 2.14518 | 1.82909 | 85.8 | 8.89 | 0.40 |
| 31/1/09-92 | 0.00633 | 0.00405 | 0.01406 | 2.61585 | 0.73008 | 28.1 | 3.55 | 0.76 |
| 31/1/09-93 | 0.00435 | 0.00401 | 0.01571 | 2.43118 | 1.13157 | 46.8 | 5.50 | 1.11 |
| 31/1/09-94 | 0.00394 | -0.00049 | 0.01575 | 2.02461 | 0.84522 | 42.0 | 4.11 | 0.95 |
| 31/1/09-95 | 0.00196 | -0.00014 | 0.01363 | 1.74743 | 1.15455 | 66.6 | 5.62 | 0.69 |
| 31/1/09-96 | 0.00209 | -0.00337 | 0.01329 | 1.67669 | 1.04534 | 62.9 | 5.08 | 1.22 |
| 31/1/09-97 | 0.00181 | 0.00065 | 0.01515 | 2.65419 | 2.10562 | 79.8 | 10.23 | 0.86 |
| 31/1/09-98 | 0.00196 | -0.00174 | 0.01327 | 1.83380 | 1.23910 | 68.1 | 6.03 | 0.63 |
| 31/1/09-100 | 0.00379 | 0.00081 | 0.01465 | 1.82654 | 0.69282 | 38.2 | 3.37 | 0.53 |
| 31/1/09-101 | 0.00384 | 0.00871 | 0.01348 | 2.72610 | 1.57837 | 58.2 | 7.67 | 0.95 |
| 31/1/09-102 | 0.00022 | 0.00189 | 0.01370 | 2.07330 | 1.99529 | 96.9 | 9.69 | 0.32 |
| 31/1/09-103 | 0.00172 | 0.00730 | 0.01341 | 2.59821 | 2.07724 | 80.4 | 10.09 | 0.58 |
| 31/1/09-104 | 0.00612 | 0.01252 | 0.01341 | 2.62474 | 0.80307 | 30.8 | 3.91 | 0.91 |
| 31/1/09-105 | 0.00006 | 0.02108 | 0.01405 | 2.16896 | 2.13903 | 99.3 | 10.39 | 1.30 |
| 31/1/09-106 | 0.00006 | 0.00114 | 0.01305 | 1.94652 | 1.91426 | 99.1 | 9.30 | 0.60 |
| 31/1/09-107 | 0.00053 | 0.00274 | 0.01348 | 2.30938 | 2.13925 | 93.2 | 10.39 | 0.78 |
| 31/1/09-108 | 0.00000 | 0.00322 | 0.01471 | 2.80920 | 2.79478 | 100.0 | 13.56 | 1.15 |
| 31/1/09-109 | 0.00000 | 0.00222 | 0.01252 | 1.97951 | 1.96479 | 100.0 | 9.55 | 0.59 |
| 31/1/09-110 | 0.00044 | 0.00163 | 0.01372 | 1.86967 | 1.72685 | 93.1 | 8.39 | 0.51 |
| 31/1/09-111 | 0.00379 | 0.00353 | 0.01367 | 2.34563 | 1.21091 | 51.9 | 5.89 | 0.97 |
| 31/1/09-112 | 0.01263 | 0.01123 | 0.01447 | 4.52005 | 0.77325 | 17.2 | 3.76 | 1.32 |
| 31/1/09-113 | 0.00376 | 0.00440 | 0.01596 | 1.95597 | 0.83099 | 42.8 | 4.04 | 0.74 |
| 31/1/09-114 | 0.00085 | 0.00058 | 0.01389 | 3.37796 | 3.11291 | 92.5 | 15.10 | 0.75 |
| 31/1/09-115 | 0.00050 | 0.01032 | 0.01461 | 1.95633 | 1.79416 | 92.4 | 8.72 | 0.91 |
| 31/1/09-116 | 0.00354 | 0.00493 | 0.01306 | 2.48332 | 1.42385 | 57.7 | 6.92 | 1.44 |
| 31/1/09-117 | 0.00235 | 0.00604 | 0.01321 | 1.65097 | 0.94329 | 57.6 | 4.59 | 0.96 |
| 31/1/09-118 | 0.00474 | 0.00647 | 0.01273 | 2.08759 | 0.67401 | 32.5 | 3.28 | 0.59 |
| 31/1/09-119 | 0.00436 | 0.00779 | 0.01228 | 1.85475 | 0.55255 | 30.0 | 2.69 | 0.65 |
| 31/1/09-120 | 0.00384 | 0.01152 | 0.01516 | 1.91882 | 0.77020 | 40.4 | 3.75 | 0.48 |
| 31/1/09-121 | 0.00814 | 0.03417 | 0.01468 | 3.31039 | 0.89469 | 27.1 | 4.35 | 2.00 |
| 31/1/09-123 | 0.00550 | 0.00198 | 0.01444 | 2.25404 | 0.61549 | 27.5 | 3.00 | 0.41 |
| 31/1/09-124 | 0.00001 | 0.00252 | 0.01430 | 2.83581 | 2.81995 | 99.9 | 13.68 | 1.59 |
| 31/1/09-125 | 0.00327 | 0.00392 | 0.01557 | 3.04840 | 2.06704 | 68.1 | 10.04 | 1.04 |
| 31/1/09-126 | 0.00395 | 0.00275 | 0.01476 | 2.99486 | 1.81246 | 60.8 | 8.81 | 0.62 |
| 31/1/09-127 | 0.00667 | 0.00511 | 0.01376 | 2.70737 | 0.72274 | 26.8 | 3.52 | 1.30 |
| 31/1/09-128 | 0.00521 | 0.00560 | 0.01438 | 2.11518 | 0.56278 | 26.8 | 2.74 | 0.57 |
| 31/1/09-130 | 0.00027 | -0.00177 | 0.01556 | 3.04350 | 2.94824 | 97.3 | 14.30 | 1.83 |
| 31/1/09-131 | 0.00177 | -0.00353 | 0.01577 | 2.39228 | 1.85548 | 78.0 | 9.02 | 0.81 |
| 31/1/09-132 | 0.00441 | -0.00026 | 0.01679 | 2.76265 | 1.44536 | 52.6 | 7.03 | 1.02 |
| 31/1/09-133 | 0.00654 | -0.00038 | 0.01962 | 3.23832 | 1.29198 | 40.1 | 6.28 | 1.48 |
| 31/1/09-134 | 0.00106 | 0.00078 | 0.01714 | 2.36143 | 2.03475 | 86.7 | 9.88 | 1.00 |
| 31/1/09-135 | 0.00854 | -0.01596 | 0.02304 | 3.47353 | 0.93350 | 27.0 | 4.54 | 3.82 |
| 31/1/09-136 | 0.00383 | -0.00493 | 0.01911 | 2.83495 | 1.68823 | 59.9 | 8.20 | 1.46 |
| 31/1/09-137 | 0.00017 | 0.00005 | 0.01463 | 2.61477 | 2.55118 | 98.1 | 12.38 | 1.32 |
| 31/1/09-138 | 0.00097 | 0.00283 | 0.01570 | 1.80181 | 1.50096 | 84.0 | 7.30 | 1.31 |
| 31/1/09-139 | 0.00083 | 0.00255 | 0.01237 | 1.45582 | 1.19587 | 83.0 | 5.82 | 1.04 |
| 31/1/09-140 | 0.00140 | -0.00017 | 0.01251 | 1.65930 | 1.23056 | 74.8 | 5.98 | 0.56 |
| 31/1/09-141 | 0.00340 | 0.01197 | 0.01347 | 2.72779 | 1.71018 | 63.0 | 8.31 | 2.82 |
| 31/1/09-142 | 0.00001 | 0.00361 | 0.01252 | 2.26401 | 2.24753 | 99.9 | 10.91 | 0.96 |
| 31/1/09-143 | 0.00096 | 0.00378 | 0.01473 | 2.67827 | 2.38178 | 89.4 | 11.56 | 1.03 |
| 31/1/09-144 | 0.00038 | 0.00573 | 0.01303 | 2.43869 | 2.31245 | 95.4 | 11.23 | 1.39 |
| 31/1/09-145 | 0.00085 | 0.00527 | 0.01296 | 3.34789 | 3.08202 | 92.5 | 14.95 | 1.01 |
| 31/1/09-146 | 0.00046 | 0.00464 | 0.01279 | 1.63082 | 1.48029 | 91.6 | 7.20 | 0.96 |
| 31/1/09-147 | 0.00091 | 0.01172 | 0.01208 | 2.00598 | 1.72266 | 86.5 | 8.37 | 1.60 |
| 31/1/09-148 | 0.00483 | 0.01065 | 0.01481 | 2.21748 | 0.77755 | 35.3 | 3.78 | 1.22 |
| 31/1/09-149 | 0.00217 | 0.00610 | 0.01427 | 2.08812 | 1.43421 | 69.2 | 6.97 | 0.58 |
| 31/1/09-150 | 0.00092 | -0.00218 | 0.01504 | 3.43541 | 3.14953 | 92.1 | 15.28 | 1.63 |
| 31/1/09-151 | 0.00078 | -0.00397 | 0.01583 | 3.62565 | 3.37956 | 93.6 | 16.39 | 1.85 |
| 31/1/09-152 | 0.00000 | 0.00029 | 0.01530 | 2.50623 | 2.49048 | 99.9 | 12.09 | 2.20 |
| 31/1/09-153 | 0.00003 | -0.00061 | 0.01500 | 2.39435 | 2.37238 | 99.7 | 11.52 | 1.10 |
| 31/1/09-154 | 0.00003 | 0.00295 | 0.01350 | 1.70881 | 1.68587 | 99.5 | 8.19 | 0.56 |
| 31/1/09-155 | 0.00326 | 0.00323 | 0.01422 | 2.50025 | 1.52157 | 61.2 | 7.40 | 0.74 |
| 31/1/09-156 | 0.00106 | 0.00364 | 0.01338 | 1.80395 | 1.47706 | 82.5 | 7.18 | 0.85 |
| 31/1/09-157 | 0.00173 | 0.00641 | 0.01486 | 2.29498 | 1.76886 | 77.6 | 8.60 | 0.97 |
| 31/1/09-158 | 0.00523 | 0.00546 | 0.01433 | 2.22669 | 0.66705 | 30.2 | 3.25 | 1.14 |
| 31/1/09-159 | 0.00582 | 0.00648 | 0.01403 | 2.71937 | 0.98687 | 36.5 | 4.80 | 0.77 |
| 31/1/09-160 | 0.00239 | 0.00718 | 0.01468 | 2.65280 | 1.93280 | 73.3 | 9.39 | 0.83 |
| 31/1/09-161 | 0.00304 | 0.01196 | 0.01424 | 2.44331 | 1.53118 | 63.0 | 7.44 | 0.89 |
| 31/1/09-162 | 0.00001 | 0.00086 | 0.01393 | 2.07524 | 2.05726 | 99.8 | 9.99 | 0.69 |
| 31/1/09-163 | 0.00004 | 0.00423 | 0.01377 | 1.97226 | 1.94762 | 99.5 | 9.46 | 0.68 |
| 31/1/09-164 | 0.00224 | 0.00399 | 0.01395 | 1.72957 | 1.05322 | 61.4 | 5.12 | 1.30 |
| 31/1/09-165 | 0.00544 | 0.01270 | 0.01697 | 3.14597 | 1.52461 | 48.7 | 7.41 | 0.90 |
| 31/1/09-166 | 0.00034 | 0.00201 | 0.01387 | 2.25098 | 2.13653 | 95.5 | 10.38 | 0.60 |
| 31/1/09-167 | 0.00223 | 0.00536 | 0.01574 | 2.02882 | 1.35726 | 67.4 | 6.60 | 0.98 |
| 31/1/09-168 | 0.00428 | 0.00554 | 0.01482 | 2.04600 | 0.76792 | 37.8 | 3.74 | 1.21 |
| 31/1/09-169 | 0.00242 | 0.00773 | 0.01533 | 2.07788 | 1.34920 | 65.4 | 6.56 | 2.51 |
| 31/1/09-170 | 0.00131 | 0.00513 | 0.01505 | 2.08431 | 1.68371 | 81.3 | 8.18 | 0.71 |
| 31/1/09-171 | 0.00226 | 0.00444 | 0.01352 | 1.54318 | 0.86233 | 56.4 | 4.20 | 0.56 |
| 31/1/09-172 | 0.00121 | 0.00807 | 0.01312 | 1.94812 | 1.57830 | 81.6 | 7.67 | 1.02 |
| 31/1/09-173 | 0.00321 | 0.02127 | 0.01359 | 2.98297 | 2.02203 | 68.1 | 9.82 | 2.59 |
| 31/1/09-174 | 0.00108 | 0.00213 | 0.01519 | 2.40298 | 2.07072 | 86.7 | 10.06 | 0.28 |
| 31/1/09-175 | 0.00656 | 0.01568 | 0.01610 | 3.03979 | 1.08950 | 36.0 | 5.30 | 1.12 |
| 31/1/09-176 | 0.00624 | 0.01714 | 0.01650 | 3.67686 | 1.81898 | 49.7 | 8.84 | 0.98 |
| 31/1/09-177 | 0.00423 | 0.02525 | 0.01440 | 2.81085 | 1.55044 | 55.4 | 7.54 | 1.96 |
| 31/1/09-178 | 0.00501 | -0.00088 | 0.01345 | 3.10055 | 1.60603 | 52.0 | 7.81 | 2.85 |
| 31/1/09-179 | 0.00116 | -0.00089 | 0.01580 | 2.35190 | 1.99434 | 85.3 | 9.69 | 2.05 |
| 31/1/09-182 | 0.00554 | 0.00759 | 0.01475 | 2.63203 | 0.98205 | 37.5 | 4.78 | 1.37 |
| 31/1/09-183 | 0.00550 | 0.00036 | 0.01481 | 2.35100 | 0.71191 | 30.5 | 3.46 | 0.93 |
| 31/1/09-184 | 0.00211 | 0.00144 | 0.01542 | 3.33835 | 2.70037 | 81.2 | 13.11 | 0.58 |
| 31/1/09-185 | 0.00205 | 0.00395 | 0.01537 | 2.82719 | 2.20689 | 78.5 | 10.72 | 0.75 |
| 31/1/09-186 | 0.00425 | 0.00554 | 0.01413 | 2.29805 | 1.02853 | 45.0 | 5.00 | 1.72 |
| 31/1/09-187 | 0.00182 | 0.00735 | 0.01214 | 2.42262 | 1.87041 | 77.7 | 9.09 | 0.59 |
| 31/1/09-188 | 0.00289 | 0.00824 | 0.01400 | 2.32626 | 1.45886 | 63.1 | 7.09 | 2.25 |
| 31/1/09-189 | 0.00151 | 0.00666 | 0.01356 | 2.20182 | 1.74142 | 79.6 | 8.46 | 1.12 |
| 31/1/09-190 | 0.00055 | -0.00134 | 0.01506 | 2.21471 | 2.03887 | 92.7 | 9.90 | 1.28 |
| 31/1/09-191 | 0.00002 | 0.00038 | 0.01822 | 2.15886 | 2.13798 | 99.7 | 10.38 | 4.56 |
| 31/1/09-192 | 0.00019 | 0.00016 | 0.01293 | 2.97994 | 2.90872 | 98.1 | 14.11 | 2.33 |
| 31/1/09-193 | 0.00018 | 0.00519 | 0.01373 | 2.77108 | 2.70386 | 98.1 | 13.12 | 1.87 |
| 31/1/09-195 | 0.00146 | 0.00054 | 0.01359 | 1.73455 | 1.28835 | 74.9 | 6.26 | 0.43 |
| 31/1/09-196 | 0.00686 | 0.00273 | 0.01547 | 2.98478 | 0.94220 | 31.7 | 4.58 | 1.70 |
| 31/1/09-197 | 0.00075 | 0.00310 | 0.01472 | 2.50828 | 2.27161 | 91.1 | 11.03 | 3.50 |
| 31/1/09-198 | 0.00060 | 0.00588 | 0.01359 | 2.09258 | 1.90231 | 91.5 | 9.24 | 2.22 |

**Table A3** Single crystal data, MO-81

| **Run ID** | **36/39 Cor** | **37/39 Cor** | **38/39 Cor** | **40/39 Cor** | **40*/39** | **%40*** | **Age** | **±** |
| --- | --- | --- | --- | --- | --- | --- | --- | --- |
| 31/1/12-01 | 0.00089 | -0.05352 | 0.01181 | 1.62487 | 1.34240 | 83.4 | 6.60 | 0.40 |
| 31/1/12-02 | 0.00033 | -0.06703 | 0.01104 | 1.30458 | 1.18625 | 91.9 | 5.83 | 0.97 |
| 31/1/12-03 | 0.00034 | -0.00607 | 0.01194 | 1.29448 | 1.17958 | 92.1 | 5.80 | 0.45 |
| 31/1/12-04 | 0.00059 | 0.00025 | 0.01160 | 1.21808 | 1.03033 | 85.6 | 5.07 | 0.27 |
| 31/1/12-05 | 0.00032 | -0.00011 | 0.01197 | 1.34023 | 1.23263 | 93.0 | 6.06 | 0.33 |
| 31/1/12-06 | 0.00129 | 0.00872 | 0.01214 | 1.44183 | 1.04864 | 73.5 | 5.16 | 0.43 |
| 31/1/12-07 | 0.00075 | 0.00190 | 0.01150 | 1.53367 | 1.29740 | 85.4 | 6.38 | 0.73 |
| 31/1/12-08 | 0.00041 | -0.01648 | 0.01174 | 1.10153 | 0.96567 | 88.8 | 4.75 | 0.34 |
| 31/1/12-09 | 0.00005 | -0.00020 | 0.01143 | 1.46026 | 1.43138 | 99.0 | 7.04 | 0.29 |
| 31/1/12-10 | 0.00001 | 0.00247 | 0.01194 | 1.24272 | 1.22503 | 99.7 | 6.02 | 0.19 |
| 31/1/12-11 | 0.00003 | -0.00614 | 0.01198 | 1.40563 | 1.38058 | 99.2 | 6.79 | 0.21 |
| 31/1/12-12 | 0.00026 | 0.00009 | 0.01179 | 1.03880 | 0.94720 | 92.5 | 4.66 | 0.57 |
| 31/1/12-13 | 0.00072 | -0.00380 | 0.01246 | 1.49689 | 1.27084 | 85.7 | 6.25 | 0.25 |
| 31/1/12-14 | 0.00005 | -0.01375 | 0.01263 | 1.25011 | 1.22106 | 98.8 | 6.00 | 0.39 |
| 31/1/12-15 | 0.00001 | -0.01446 | 0.01152 | 1.52197 | 1.50337 | 99.7 | 7.39 | 0.29 |
| 31/1/12-16 | 0.00056 | -0.00838 | 0.01180 | 1.35629 | 1.17669 | 87.7 | 5.79 | 0.24 |
| 31/1/12-17 | 0.00058 | 0.00788 | 0.01235 | 1.13438 | 0.95038 | 84.9 | 4.67 | 0.24 |
| 31/1/12-18 | 0.00153 | 0.01057 | 0.01347 | 1.90823 | 1.44176 | 76.1 | 7.09 | 0.34 |
| 31/1/12-19 | 0.00025 | 0.00026 | 0.01217 | 1.32850 | 1.23901 | 94.3 | 6.09 | 0.18 |
| 31/1/12-20 | 0.00044 | -0.00293 | 0.01346 | 1.13162 | 0.98770 | 88.4 | 4.86 | 0.24 |
| 31/1/12-21 | 0.00008 | -0.02056 | 0.01161 | 1.09645 | 1.05647 | 97.6 | 5.20 | 0.34 |
| 31/1/12-22 | 0.00019 | -0.05022 | 0.01140 | 1.07115 | 0.99471 | 94.1 | 4.89 | 0.64 |
| 31/1/12-23 | 0.00065 | -0.01226 | 0.01180 | 1.39590 | 1.18783 | 86.0 | 5.84 | 0.20 |
| 31/1/12-24 | 0.00024 | -0.00108 | 0.01205 | 1.63675 | 1.55140 | 95.6 | 7.62 | 0.19 |
| 31/1/12-25 | 0.00088 | 0.01415 | 0.01240 | 1.51297 | 1.23984 | 82.7 | 6.10 | 0.20 |
| 31/1/12-26 | 0.00171 | 0.01287 | 0.01218 | 1.32460 | 0.80511 | 61.4 | 3.96 | 0.76 |
| 31/1/12-27 | 0.00114 | 0.02727 | 0.01284 | 1.07379 | 0.72418 | 68.4 | 3.56 | 0.41 |
| 31/1/12-28 | 0.00065 | 0.05350 | 0.01227 | 1.10439 | 0.90486 | 83.0 | 4.45 | 0.21 |
| 31/1/12-29 | 0.00044 | 0.00468 | 0.01188 | 1.12496 | 0.98125 | 88.3 | 4.83 | 0.15 |
| 31/1/12-30 | 0.00069 | 0.00927 | 0.01229 | 1.56428 | 1.34697 | 86.9 | 6.62 | 0.20 |
| 31/1/12-31 | 0.00090 | -0.00160 | 0.01188 | 1.57992 | 1.29885 | 83.0 | 6.39 | 0.40 |
| 31/1/12-32 | 0.00025 | -0.00272 | 0.01195 | 1.54306 | 1.45319 | 95.1 | 7.14 | 0.20 |
| 31/1/12-33 | 0.00010 | -0.01395 | 0.01242 | 1.25666 | 1.21082 | 97.5 | 5.95 | 0.36 |
| 31/1/12-34 | 0.00037 | 0.00051 | 0.01223 | 1.39016 | 1.26752 | 92.1 | 6.23 | 0.14 |
| 31/1/12-36 | 0.00091 | 0.01892 | 0.01325 | 1.57927 | 1.29872 | 83.0 | 6.39 | 0.36 |
| 31/1/12-37 | 0.00020 | -0.00801 | 0.01157 | 1.47801 | 1.40423 | 95.9 | 6.90 | 0.42 |
| 31/1/12-38 | 0.00094 | -0.00474 | 0.01231 | 1.53014 | 1.23617 | 81.6 | 6.08 | 0.27 |
| 31/1/12-39 | 0.00031 | 0.00467 | 0.01150 | 1.28100 | 1.17607 | 92.8 | 5.78 | 0.32 |
| 31/1/12-40 | 0.00043 | -0.00956 | 0.01155 | 1.27958 | 1.13816 | 90.0 | 5.60 | 0.24 |
| 31/1/12-41 | 0.00037 | 0.01108 | 0.01187 | 1.08819 | 0.96690 | 90.0 | 4.76 | 0.21 |
| 31/1/12-42 | 0.00087 | 0.01398 | 0.01230 | 1.33687 | 1.06743 | 80.7 | 5.25 | 0.39 |
| 31/1/12-43 | 0.00106 | 0.01320 | 0.01285 | 1.55740 | 1.23198 | 79.8 | 6.06 | 0.34 |
| 31/1/12-44 | 0.00025 | 0.00157 | 0.01205 | 1.41020 | 1.32347 | 94.8 | 6.51 | 0.18 |
| 31/1/12-45 | 0.00025 | 0.00344 | 0.01322 | 1.41787 | 1.32865 | 94.7 | 6.53 | 0.21 |
| 31/1/12-46 | 0.00007 | 0.00542 | 0.01201 | 1.18175 | 1.14661 | 98.2 | 5.64 | 0.37 |
| 31/1/12-47 | 0.00040 | -0.01069 | 0.01172 | 1.50385 | 1.37005 | 92.0 | 6.74 | 0.41 |
| 31/1/12-48 | 0.00115 | 0.00890 | 0.01194 | 1.20025 | 0.84833 | 71.5 | 4.17 | 0.56 |
| 31/1/12-49 | 0.00023 | -0.00795 | 0.01090 | 1.18538 | 1.10229 | 94.1 | 5.42 | 1.54 |
| 31/1/12-50 | 0.00104 | 0.01631 | 0.01186 | 1.21454 | 0.89386 | 74.5 | 4.40 | 0.43 |
| 31/1/12-51 | 0.00041 | -0.00033 | 0.01187 | 1.35701 | 1.22233 | 91.0 | 6.01 | 0.22 |
| 31/1/12-52 | 0.00131 | -0.00620 | 0.01205 | 1.35813 | 0.95623 | 71.2 | 4.70 | 0.32 |
| 31/1/12-53 | 0.00213 | 0.01553 | 0.01239 | 1.49593 | 0.85356 | 57.6 | 4.20 | 0.69 |
| 31/1/12-54 | 0.00037 | 0.00590 | 0.01238 | 1.43236 | 1.30798 | 92.2 | 6.43 | 0.27 |
| 31/1/12-55 | 0.00080 | 0.00552 | 0.01219 | 1.41506 | 1.16469 | 83.1 | 5.73 | 0.16 |
| 31/1/12-56 | 0.00139 | -0.00013 | 0.01215 | 1.73594 | 1.31212 | 76.2 | 6.45 | 0.27 |
| 31/1/12-57 | 0.00028 | 0.03803 | 0.01284 | 1.89210 | 1.79803 | 95.7 | 8.83 | 1.18 |
| 31/1/12-58 | 0.00003 | 0.00795 | 0.01235 | 1.41082 | 1.38847 | 99.4 | 6.83 | 0.41 |
| 31/1/12-61 | 0.00040 | -0.00259 | 0.01194 | 1.46549 | 1.33349 | 91.9 | 6.56 | 0.20 |
| 31/1/12-62 | 0.00172 | 0.00721 | 0.01257 | 1.16642 | 0.64410 | 55.9 | 3.17 | 0.89 |
| 31/1/12-63 | 0.00093 | 0.00284 | 0.01252 | 1.43243 | 1.14369 | 80.6 | 5.62 | 0.18 |
| 31/1/12-64 | 0.00074 | 0.01498 | 0.01167 | 1.24688 | 1.01397 | 82.3 | 4.99 | 0.41 |
| 31/1/12-65 | 0.00065 | -0.00066 | 0.01146 | 1.29507 | 1.08838 | 85.0 | 5.35 | 0.34 |
| 31/1/12-66 | 0.00597 | 0.03016 | 0.01222 | 3.30482 | 1.52896 | 46.5 | 7.51 | 0.99 |
| 31/1/12-67 | 0.00093 | 0.03342 | 0.01131 | 1.48653 | 1.20065 | 81.6 | 5.90 | 1.19 |
| 31/1/12-68 | 0.00212 | 0.07641 | 0.01127 | 1.79781 | 1.16454 | 65.3 | 5.73 | 1.01 |
| 31/1/12-69 | 0.00044 | -0.00419 | 0.01126 | 1.54442 | 1.40077 | 91.5 | 6.89 | 0.53 |
| 31/1/12-70 | 0.00216 | -0.04201 | 0.01170 | 2.14256 | 1.48622 | 69.8 | 7.31 | 0.69 |
| 31/1/12-71 | 0.00019 | -0.01200 | 0.01156 | 1.55262 | 1.48013 | 96.2 | 7.28 | 0.41 |
| 31/1/12-72 | 0.00056 | -0.03899 | 0.01110 | 1.42011 | 1.23728 | 88.0 | 6.08 | 0.75 |
| 31/1/12-73 | 0.00287 | 0.00730 | 0.01244 | 2.00375 | 1.14067 | 57.3 | 5.61 | 0.19 |
| 31/1/12-74 | 0.00112 | 0.01846 | 0.01236 | 1.96764 | 1.62376 | 83.1 | 7.98 | 0.53 |
| 31/1/12-75 | 0.00097 | -0.01526 | 0.01190 | 1.54738 | 1.24508 | 81.2 | 6.12 | 0.63 |
| 31/1/12-76 | 0.00530 | 0.00029 | 0.01309 | 2.61225 | 1.03278 | 39.8 | 5.08 | 0.23 |
| 31/1/12-77 | 0.00016 | 0.00012 | 0.01196 | 1.27489 | 1.21434 | 96.3 | 5.97 | 0.54 |
| 31/1/12-78 | 0.00258 | -0.00431 | 0.01212 | 1.70641 | 0.92840 | 54.9 | 4.57 | 1.18 |
| 31/1/12-79 | 0.00044 | -0.01988 | 0.01266 | 1.30908 | 1.16288 | 89.8 | 5.72 | 0.80 |
| 31/1/12-80 | 0.00066 | 0.00036 | 0.01223 | 1.77006 | 1.55958 | 88.8 | 7.66 | 0.72 |
| 31/1/12-81 | 0.00149 | 0.05328 | 0.01231 | 2.53828 | 2.08950 | 82.8 | 10.26 | 1.34 |
| 31/1/12-82 | 0.00021 | 0.01087 | 0.01105 | 1.60074 | 1.52582 | 96.2 | 7.50 | 0.47 |
| 31/1/12-83 | 0.00060 | 0.01937 | 0.01049 | 1.86564 | 1.67726 | 90.6 | 8.24 | 1.13 |
| 31/1/12-84 | 0.00069 | -0.00230 | 0.01242 | 1.58595 | 1.36891 | 87.1 | 6.73 | 0.40 |
| 31/1/12-85 | 0.00279 | -0.00895 | 0.01228 | 2.09062 | 1.25153 | 60.3 | 6.15 | 0.25 |
| 31/1/12-86 | 0.00008 | -0.00480 | 0.01176 | 1.29837 | 1.25952 | 98.1 | 6.19 | 0.32 |
| 31/1/12-87 | 0.00332 | 0.00128 | 0.01272 | 2.16015 | 1.16394 | 54.2 | 5.72 | 0.19 |
| 31/1/12-88 | 0.00087 | -0.01360 | 0.01207 | 1.04377 | 0.77063 | 74.9 | 3.79 | 0.71 |
| 31/1/12-89 | 0.00077 | -0.03216 | 0.01214 | 1.29369 | 1.04974 | 82.1 | 5.16 | 0.91 |
| 31/1/12-90 | 0.00347 | -0.02922 | 0.01258 | 2.46875 | 1.42720 | 58.2 | 7.02 | 0.82 |
| 31/1/12-91 | 0.00175 | -0.01035 | 0.01238 | 1.89199 | 1.35889 | 72.4 | 6.68 | 0.54 |
| 31/1/12-92 | 0.01654 | -0.01399 | 0.01618 | 6.09900 | 1.19421 | 19.6 | 5.87 | 1.16 |
| 31/1/12-93 | 0.00002 | -0.02156 | 0.01671 | 1.56148 | 1.53978 | 99.5 | 7.57 | 1.20 |
| 31/1/12-94 | 0.00046 | -0.00882 | 0.01250 | 1.67707 | 1.52705 | 91.8 | 7.51 | 0.36 |
| 31/1/12-96 | 0.00179 | -0.05155 | 0.01437 | 3.15322 | 2.60535 | 83.0 | 12.79 | 5.52 |
| 31/1/13-01 | 0.00011 | -0.03365 | 0.01193 | 1.20031 | 1.15124 | 97.1 | 5.66 | 0.55 |
| 31/1/13-02 | 0.00397 | -0.00754 | 0.01315 | 2.28881 | 1.09941 | 48.3 | 5.41 | 0.54 |
| 31/1/13-03 | 0.00013 | -0.00943 | 0.01199 | 1.11977 | 1.06641 | 96.5 | 5.24 | 0.28 |
| 31/1/13-04 | 0.00107 | -0.00628 | 0.01223 | 1.42582 | 1.09339 | 77.5 | 5.38 | 0.21 |
| 31/1/13-05 | 0.00105 | 0.00268 | 0.01209 | 1.13001 | 0.80694 | 72.3 | 3.97 | 0.47 |
| 31/1/13-06 | 0.00040 | -0.00591 | 0.01184 | 1.35317 | 1.22117 | 91.2 | 6.00 | 0.25 |
| 31/1/13-07 | 0.00038 | 0.00688 | 0.01221 | 1.13570 | 1.01067 | 90.1 | 4.97 | 0.26 |
| 31/1/13-08 | 0.00107 | -0.00740 | 0.01201 | 1.69254 | 1.36135 | 81.1 | 6.69 | 0.21 |
| 31/1/13-10 | 0.00046 | -0.00842 | 0.01240 | 1.30142 | 1.15053 | 89.4 | 5.66 | 0.48 |
| 31/1/13-11 | 0.00066 | 0.01192 | 0.01262 | 0.94263 | 0.73527 | 79.2 | 3.62 | 0.31 |
| 31/1/13-12 | 0.00096 | -0.00058 | 0.01235 | 1.51576 | 1.21654 | 81.0 | 5.98 | 0.39 |
| 31/1/13-13 | 0.00014 | 0.00396 | 0.01181 | 1.48332 | 1.42819 | 97.2 | 7.02 | 0.40 |
| 31/1/13-14 | 0.00037 | 0.01363 | 0.01210 | 1.34724 | 1.22630 | 92.0 | 6.03 | 0.28 |
| 31/1/13-15 | 0.00104 | -0.00540 | 0.01176 | 1.37657 | 1.05387 | 77.4 | 5.18 | 0.33 |
| 31/1/13-16 | 0.00043 | -0.00825 | 0.01161 | 1.23998 | 1.09736 | 89.5 | 5.40 | 0.25 |
| 31/1/13-17 | 0.00042 | 0.00459 | 0.01227 | 1.40214 | 1.26525 | 91.2 | 6.22 | 0.32 |
| 31/1/13-18 | 0.00211 | -0.00261 | 0.01226 | 2.05614 | 1.41882 | 69.5 | 6.97 | 0.35 |
| 31/1/13-19 | 0.00136 | -0.00227 | 0.01238 | 1.80997 | 1.39467 | 77.7 | 6.86 | 0.17 |
| 31/1/13-20 | 0.00014 | -0.00577 | 0.01170 | 1.30489 | 1.24809 | 96.7 | 6.14 | 0.23 |
| 31/1/13-21 | 0.00170 | 0.01924 | 0.01223 | 1.86397 | 1.35049 | 73.0 | 6.64 | 0.53 |
| 31/1/13-22 | 0.00038 | 0.00972 | 0.01203 | 1.24679 | 1.12264 | 91.1 | 5.52 | 0.23 |
| 31/1/13-23 | 0.00026 | 0.01052 | 0.01152 | 1.33236 | 1.24265 | 94.3 | 6.11 | 0.54 |
| 31/1/13-24 | 0.00044 | 0.02015 | 0.01177 | 1.33982 | 1.19658 | 90.3 | 5.88 | 0.29 |
| 31/1/13-25 | 0.00018 | -0.00572 | 0.01169 | 1.45358 | 1.38463 | 96.2 | 6.81 | 0.61 |
| 31/1/13-26 | 0.00016 | -0.02245 | 0.01115 | 1.20578 | 1.14123 | 95.8 | 5.61 | 0.63 |
| 31/1/13-27 | 0.00078 | 0.00607 | 0.01230 | 1.38937 | 1.14653 | 83.4 | 5.64 | 0.46 |
| 31/1/13-28 | 0.00028 | -0.00526 | 0.01183 | 1.38500 | 1.28684 | 93.9 | 6.33 | 0.27 |
| 31/1/13-29 | 0.00070 | 0.01774 | 0.01224 | 1.55208 | 1.33208 | 86.6 | 6.55 | 0.30 |
| 31/1/13-30 | 0.00068 | 0.00178 | 0.01214 | 1.39600 | 1.18015 | 85.4 | 5.80 | 0.18 |
| 31/1/13-31 | 0.00072 | -0.00657 | 0.01187 | 1.28687 | 1.05830 | 83.2 | 5.20 | 0.21 |
| 31/1/13-32 | 0.00055 | 0.00232 | 0.01266 | 1.54008 | 1.36456 | 89.4 | 6.71 | 0.22 |
| 31/1/13-33 | 0.00188 | 0.01064 | 0.01304 | 1.37888 | 0.80897 | 59.3 | 3.98 | 0.19 |
| 31/1/13-34 | 0.00036 | 0.00742 | 0.01260 | 1.15157 | 1.03027 | 90.6 | 5.07 | 0.29 |
| 31/1/13-35 | 0.00024 | 0.01519 | 0.01317 | 1.17513 | 1.09011 | 93.9 | 5.36 | 0.40 |
| 31/1/13-36 | 0.00041 | 0.00456 | 0.01204 | 1.37764 | 1.24367 | 91.2 | 6.11 | 0.24 |
| 31/1/13-37 | 0.00001 | -0.00825 | 0.01182 | 1.34333 | 1.32602 | 99.8 | 6.52 | 0.25 |
| 31/1/13-38 | 0.00035 | 0.00213 | 0.01171 | 1.24567 | 1.12791 | 91.6 | 5.55 | 0.40 |
| 31/1/13-39 | 0.00183 | 0.02603 | 0.01329 | 1.62636 | 1.07520 | 66.7 | 5.29 | 2.30 |
| 31/1/13-40 | 0.00136 | 0.00255 | 0.01222 | 1.39189 | 0.97454 | 70.7 | 4.79 | 0.42 |
| 31/1/13-41 | 0.00021 | 0.00656 | 0.01186 | 1.07050 | 0.99374 | 94.1 | 4.89 | 0.26 |
| 31/1/13-42 | 0.00047 | -0.01411 | 0.01209 | 1.36964 | 1.21547 | 89.7 | 5.98 | 0.29 |
| 31/1/13-43 | 0.00057 | 0.00630 | 0.01231 | 1.14995 | 0.96805 | 85.2 | 4.76 | 0.25 |
| 31/1/13-44 | 0.00070 | -0.00045 | 0.01221 | 1.18044 | 0.95910 | 82.2 | 4.72 | 0.34 |
| 31/1/13-45 | 0.00069 | 0.01132 | 0.01212 | 1.31334 | 1.09665 | 84.4 | 5.39 | 0.50 |
| 31/1/13-46 | 0.00110 | 0.00215 | 0.01239 | 1.19088 | 0.85314 | 72.5 | 4.20 | 0.37 |
| 31/1/13-47 | 0.00011 | 0.00854 | 0.01241 | 0.96248 | 0.91795 | 96.8 | 4.52 | 0.57 |
| 31/1/13-48 | 0.00128 | 0.00698 | 0.01218 | 1.89731 | 1.50604 | 80.0 | 7.40 | 0.46 |
| 31/1/13-49 | 0.00359 | 0.01060 | 0.01306 | 2.61114 | 1.53716 | 59.2 | 7.55 | 0.25 |
| 31/1/13-50 | 0.00088 | 0.00116 | 0.01216 | 1.55490 | 1.27932 | 83.0 | 6.29 | 0.17 |
| 31/1/13-51 | 0.00008 | 0.01590 | 0.01180 | 1.79045 | 1.75367 | 98.7 | 8.62 | 0.52 |
| 31/1/13-52 | 0.00046 | 0.00027 | 0.01185 | 1.24569 | 1.09415 | 88.9 | 5.38 | 0.37 |
| 31/1/13-53 | 0.00130 | 0.01876 | 0.01429 | 1.63039 | 1.23501 | 76.4 | 6.07 | 0.70 |
| 31/1/13-54 | 0.00036 | 0.00239 | 0.01191 | 1.45779 | 1.33700 | 92.6 | 6.57 | 0.30 |
| 31/1/13-55 | 0.00053 | -0.00730 | 0.01378 | 1.50009 | 1.32928 | 89.5 | 6.54 | 0.30 |
| 31/1/13-56 | 0.00101 | -0.00429 | 0.01200 | 1.67268 | 1.36063 | 82.0 | 6.69 | 0.42 |
| 31/1/13-57 | 0.00054 | -0.00406 | 0.01207 | 1.06813 | 0.89526 | 85.0 | 4.40 | 0.27 |
| 31/1/13-58 | 0.00130 | 0.00259 | 0.01271 | 1.59682 | 1.19794 | 75.7 | 5.89 | 0.43 |
| 31/1/13-59 | 0.00063 | -0.01722 | 0.01254 | 1.43882 | 1.23562 | 86.7 | 6.08 | 0.32 |
| 31/1/13-60 | 0.00090 | -0.06069 | 0.01258 | 2.02743 | 1.74128 | 86.5 | 8.56 | 0.75 |
| 31/1/13-61 | 0.00220 | -0.00448 | 0.01238 | 2.12280 | 1.45932 | 69.2 | 7.17 | 0.23 |
| 31/1/13-62 | 0.00079 | -0.01379 | 0.01206 | 1.51395 | 1.26378 | 84.3 | 6.21 | 0.41 |
| 31/1/13-63 | 0.00199 | -0.00410 | 0.01186 | 2.21540 | 1.61352 | 73.3 | 7.93 | 0.38 |
| 31/1/13-64 | 0.00065 | -0.00479 | 0.01173 | 1.06200 | 0.85590 | 81.7 | 4.21 | 0.59 |
| 31/1/13-65 | 0.00005 | -0.02256 | 0.01192 | 1.16513 | 1.13291 | 98.4 | 5.57 | 0.63 |
| 31/1/13-66 | 0.00040 | 0.02211 | 0.01293 | 1.48388 | 1.35393 | 92.1 | 6.66 | 0.77 |
| 31/1/13-67 | 0.00102 | -0.02085 | 0.01307 | 1.37794 | 1.06052 | 77.8 | 5.22 | 0.70 |
| 31/1/13-68 | 0.00040 | -0.00211 | 0.01242 | 1.38777 | 1.25464 | 91.4 | 6.17 | 0.22 |
| 31/1/13-69 | 0.00072 | 0.00744 | 0.01114 | 1.41334 | 1.18581 | 84.8 | 5.83 | 0.77 |
| 31/1/13-70 | 0.00031 | 0.00693 | 0.01172 | 1.60124 | 1.49681 | 94.3 | 7.36 | 0.86 |
| 31/1/13-71 | 0.00113 | 0.00061 | 0.01219 | 1.09509 | 0.74551 | 69.0 | 3.67 | 0.47 |
| 31/1/13-72 | 0.00059 | 0.00419 | 0.01180 | 1.40979 | 1.22289 | 87.6 | 6.01 | 0.23 |
| 31/1/13-73 | 0.00008 | 0.00000 | 0.01325 | 1.42809 | 1.38950 | 98.3 | 6.83 | 0.44 |
| 31/1/13-74 | 0.00439 | 0.01856 | 0.01382 | 2.89924 | 1.58853 | 55.1 | 7.81 | 0.40 |
| 31/1/13-75 | 0.00100 | 0.00868 | 0.01307 | 1.84579 | 1.53721 | 83.9 | 7.56 | 0.44 |
| 31/1/13-76 | 0.00026 | 0.01294 | 0.01359 | 1.47268 | 1.38250 | 94.8 | 6.80 | 0.40 |
| 31/1/13-77 | 0.00013 | -0.01730 | 0.01167 | 1.01456 | 0.95903 | 95.9 | 4.72 | 0.34 |
| 31/1/13-78 | 0.00018 | 0.00000 | 0.01195 | 1.29910 | 1.23149 | 95.9 | 6.06 | 0.92 |
| 31/1/13-79 | 0.00025 | -0.03369 | 0.01208 | 1.30091 | 1.20887 | 94.0 | 5.94 | 0.37 |
| 31/1/13-80 | 0.00008 | -0.02519 | 0.01313 | 1.47299 | 1.43273 | 98.2 | 7.04 | 0.33 |
| 31/1/13-81 | 0.00110 | 0.02900 | 0.01219 | 1.53038 | 1.19409 | 78.8 | 5.87 | 0.47 |
| 31/1/13-82 | 0.00030 | 0.00500 | 0.01175 | 1.41468 | 1.31145 | 93.7 | 6.45 | 0.32 |
| 31/1/13-83 | 0.00079 | 0.01596 | 0.01185 | 1.40973 | 1.16248 | 83.3 | 5.72 | 0.37 |
| 31/1/13-84 | 0.00061 | 0.03473 | 0.01188 | 1.55115 | 1.35981 | 88.5 | 6.68 | 1.57 |
| 31/1/13-85 | 0.00110 | 0.01612 | 0.01208 | 1.49468 | 1.15749 | 78.2 | 5.69 | 0.42 |
| 31/1/13-86 | 0.00188 | 0.01412 | 0.01208 | 1.57396 | 1.00626 | 64.5 | 4.95 | 0.79 |
| 31/1/13-87 | 0.00245 | 0.02854 | 0.01257 | 1.69521 | 0.96073 | 57.2 | 4.73 | 1.22 |
| 31/1/13-88 | 0.00022 | -0.00071 | 0.01269 | 1.36074 | 1.28009 | 95.1 | 6.29 | 0.30 |
| 31/1/13-89 | 0.00028 | -0.00570 | 0.01198 | 1.39575 | 1.29819 | 94.0 | 6.38 | 0.91 |
| 31/1/13-90 | 0.00010 | 0.01488 | 0.01112 | 1.54192 | 1.49958 | 98.2 | 7.37 | 0.41 |
| 31/1/13-91 | 0.00126 | 0.00055 | 0.01203 | 1.57899 | 1.19319 | 76.3 | 5.87 | 0.15 |
| 31/1/13-92 | 0.00189 | 0.00416 | 0.01224 | 1.95865 | 1.38592 | 71.3 | 6.81 | 0.90 |
| 31/1/13-93 | 0.00288 | -0.02448 | 0.01257 | 2.22349 | 1.35520 | 61.3 | 6.66 | 0.73 |
| 31/1/13-94 | 0.00111 | 0.00001 | 0.00789 | 2.28548 | 1.94455 | 85.6 | 9.55 | 1.31 |
| 31/1/13-95 | 0.00067 | 0.00000 | 0.01049 | 2.28920 | 2.07581 | 91.2 | 10.19 | 0.80 |
| 31/1/13-96 | 0.00268 | -0.01421 | 0.01206 | 2.21560 | 1.40897 | 64.0 | 6.93 | 0.30 |
| 31/1/13-97 | 0.00036 | -0.00152 | 0.01189 | 1.30834 | 1.18771 | 91.8 | 5.84 | 0.35 |
| 31/1/13-98 | 0.00042 | -0.01010 | 0.01206 | 1.35462 | 1.21417 | 90.6 | 5.97 | 0.27 |
| 31/1/13-99 | 0.00483 | -0.00140 | 0.01181 | 3.18476 | 1.74271 | 55.0 | 8.56 | 1.47 |
| 31/1/13-100 | 0.00081 | 0.00585 | 0.01157 | 1.59643 | 1.34475 | 85.0 | 6.61 | 0.55 |
| 31/1/13-101 | 0.00008 | 0.01723 | 0.01205 | 1.46983 | 1.43493 | 98.6 | 7.05 | 0.63 |
| 31/1/13-102 | 0.00195 | 0.03495 | 0.01293 | 1.93664 | 1.34945 | 70.2 | 6.63 | 0.78 |
| 31/1/13-103 | 0.00159 | 0.00152 | 0.01227 | 1.58497 | 1.10196 | 70.2 | 5.42 | 0.63 |
| 31/1/13-104 | 0.00161 | 0.00842 | 0.01239 | 1.52008 | 1.03091 | 68.5 | 5.07 | 0.22 |
| 31/1/13-105 | 0.00260 | 0.01596 | 0.01358 | 2.10976 | 1.33005 | 63.5 | 6.54 | 0.67 |
| 31/1/13-106 | 0.00090 | -0.00731 | 0.01179 | 1.55562 | 1.27484 | 82.7 | 6.27 | 0.27 |
| 31/1/13-107 | 0.00303 | 0.00769 | 0.01228 | 1.78399 | 0.87482 | 49.4 | 4.30 | 0.46 |
| 31/1/13-108 | 0.00387 | 0.00432 | 0.01127 | 3.05073 | 1.89185 | 62.3 | 9.29 | 3.06 |

**Table A4 Single crystal data, MO-139**

| **Run ID** | **36/39 Cor** | **37/39 Cor** | **38/39 Cor** | **40/39 Cor** | **40*/39** | **%40*** | **Age** | **±** |
| --- | --- | --- | --- | --- | --- | --- | --- | --- |
| 31/2/04-01 | 0.00159 | -0.00008 | 0.01219 | 2.41658 | 1.93112 | 80.4 | 9.56 | 0.36 |
| 31/2/04-02 | 0.00412 | 0.00121 | 0.01311 | 3.06757 | 1.83696 | 60.2 | 9.09 | 0.33 |
| 31/2/04-03 | 0.00092 | -0.00145 | 0.01197 | 2.63665 | 2.35026 | 89.6 | 11.62 | 0.42 |
| 31/2/04-04 | 0.00036 | 0.00483 | 0.01162 | 2.14142 | 2.02249 | 95.1 | 10.01 | 0.66 |
| 31/2/04-05 | 0.00061 | -0.00243 | 0.01200 | 1.97033 | 1.77554 | 90.8 | 8.79 | 0.41 |
| 31/2/04-06 | 0.00126 | 0.00965 | 0.01207 | 1.87213 | 1.48681 | 80.0 | 7.36 | 0.38 |
| 31/2/04-07 | 0.00143 | 0.02380 | 0.01271 | 1.86373 | 1.43046 | 77.3 | 7.08 | 0.34 |
| 31/2/04-08 | 0.00040 | 0.00800 | 0.01280 | 1.79978 | 1.66831 | 93.4 | 8.26 | 0.38 |
| 31/2/04-09 | 0.00018 | -0.00496 | 0.01165 | 3.59626 | 3.52805 | 98.5 | 17.42 | 0.55 |
| 31/2/04-10 | 0.00027 | 0.00755 | 0.01211 | 2.77886 | 2.68418 | 97.1 | 13.27 | 0.42 |
| 31/2/04-11 | 0.00092 | 0.00327 | 0.01323 | 2.63042 | 2.34532 | 89.6 | 11.60 | 0.42 |
| 31/2/04-12 | 0.00520 | -0.00025 | 0.01274 | 8.08919 | 6.53796 | 81.0 | 32.15 | 0.92 |
| 31/2/04-13 | 0.00034 | -0.00801 | 0.01152 | 1.65533 | 1.54014 | 93.9 | 7.62 | 0.36 |
| 31/2/04-14 | 0.00183 | -0.00506 | 0.01249 | 2.87361 | 2.31924 | 81.1 | 11.47 | 0.33 |
| 31/2/04-15 | 0.00137 | -0.00679 | 0.01205 | 2.60749 | 2.18739 | 84.4 | 10.82 | 0.81 |
| 31/2/04-16 | 0.00168 | 0.00064 | 0.01214 | 2.46248 | 1.95248 | 79.8 | 9.66 | 0.37 |
| 31/2/04-17 | 0.00016 | -0.01648 | 0.01264 | 3.84753 | 3.78358 | 98.7 | 18.67 | 0.54 |
| 31/2/04-18 | 0.00271 | -0.00201 | 0.01316 | 3.15676 | 2.34146 | 74.5 | 11.58 | 0.36 |
| 31/2/04-19 | 0.00074 | -0.01347 | 0.01297 | 2.41136 | 2.17797 | 90.9 | 10.77 | 0.38 |
| 31/2/04-20 | 0.00061 | -0.00642 | 0.01246 | 2.27192 | 2.07798 | 92.0 | 10.28 | 0.46 |
| 31/2/04-21 | 0.00015 | 0.00352 | 0.01193 | 1.69605 | 1.63775 | 97.4 | 8.31 | 0.24 |
| 31/2/04-22 | 0.00076 | 0.00205 | 0.01297 | 3.85615 | 3.61709 | 94.2 | 17.86 | 0.56 |
| 31/2/04-23 | 0.00075 | 0.00313 | 0.01268 | 2.75016 | 2.51380 | 91.9 | 12.43 | 0.91 |
| 31/2/04-24 | 0.00088 | 0.00849 | 0.01200 | 1.69613 | 1.42178 | 84.5 | 7.04 | 0.31 |
| 31/2/04-25 | 0.00156 | 0.01135 | 0.01277 | 2.44126 | 1.96620 | 81.0 | 9.73 | 0.55 |
| 31/2/04-26 | 0.00108 | 0.02533 | 0.01237 | 3.57169 | 3.24063 | 91.1 | 16.01 | 0.82 |
| 31/2/04-27 | 0.00017 | 0.01760 | 0.01245 | 2.09931 | 2.03541 | 97.6 | 10.33 | 0.63 |
| 31/2/04-28 | 0.00125 | 0.00637 | 0.01313 | 2.09812 | 1.71406 | 82.3 | 8.48 | 0.40 |
| 31/2/04-29 | 0.00127 | 0.01756 | 0.01330 | 2.00089 | 1.61372 | 81.2 | 7.99 | 0.38 |
| 31/2/04-30 | 0.00128 | 0.00343 | 0.01255 | 2.26514 | 1.87267 | 83.2 | 9.27 | 0.50 |
| 31/2/04-31 | 0.00661 | 0.00766 | 0.01505 | 3.91539 | 1.94898 | 50.0 | 9.64 | 0.59 |
| 31/2/04-32 | 0.00059 | 0.00782 | 0.01262 | 2.80607 | 2.61726 | 93.7 | 12.94 | 0.54 |
| 31/2/04-33 | 0.00056 | 0.01481 | 0.01225 | 2.60349 | 2.42430 | 93.6 | 11.99 | 0.45 |
| 31/2/04-34 | 0.00077 | -0.03165 | 0.01239 | 1.97011 | 1.72573 | 88.2 | 8.54 | 0.64 |
| 31/2/04-35 | 0.00734 | -0.00050 | 0.01439 | 3.89792 | 1.71341 | 44.1 | 8.48 | 0.40 |
| 31/2/04-36 | 0.00387 | 0.00173 | 0.01253 | 3.36668 | 2.20872 | 65.9 | 10.92 | 0.33 |
| 31/2/04-37 | 0.00018 | -0.01463 | 0.01242 | 2.59488 | 2.52449 | 97.8 | 12.48 | 0.69 |
| 31/2/04-38 | 0.00104 | 0.01151 | 0.01273 | 1.90615 | 1.58435 | 83.7 | 7.84 | 0.58 |
| 31/2/04-39 | 0.00087 | 0.01437 | 0.01234 | 2.04626 | 1.77555 | 87.4 | 8.79 | 0.31 |
| 31/2/04-40 | 0.00017 | 0.00453 | 0.01222 | 1.96702 | 1.90211 | 97.4 | 9.41 | 0.30 |
| 31/2/04-41 | 0.00034 | -0.00566 | 0.01158 | 2.88472 | 2.76954 | 96.5 | 14.04 | 0.53 |
| 31/2/04-42 | 0.00007 | -0.00521 | 0.01204 | 2.75451 | 2.71992 | 99.3 | 13.78 | 0.43 |
| 31/2/04-43 | 0.00002 | -0.01100 | 0.01265 | 1.98044 | 1.95898 | 99.6 | 9.94 | 0.70 |
| 31/2/04-44 | 0.00077 | 0.00034 | 0.01218 | 1.83703 | 1.59417 | 87.5 | 7.89 | 0.38 |
| 31/2/04-45 | 0.00153 | -0.00968 | 0.01233 | 2.26585 | 1.79730 | 79.8 | 8.89 | 0.46 |
| 31/2/04-46 | 0.00118 | -0.01295 | 0.01252 | 2.59299 | 2.22880 | 86.4 | 11.02 | 0.65 |
| 31/2/04-47 | 0.00057 | -0.01820 | 0.01177 | 2.35164 | 2.16836 | 92.8 | 10.73 | 0.46 |
| 31/2/04-48 | 0.00220 | -0.02481 | 0.01258 | 2.43124 | 1.76317 | 73.0 | 8.73 | 0.81 |
| 31/2/04-49 | 0.00101 | -0.00267 | 0.01285 | 2.60203 | 2.28990 | 88.5 | 11.33 | 0.88 |
| 31/2/04-50 | 0.00191 | 0.00186 | 0.01121 | 3.13419 | 2.55533 | 81.9 | 12.63 | 0.58 |
| 31/2/04-51 | 0.00065 | 0.00774 | 0.01221 | 2.44399 | 2.23947 | 92.2 | 11.36 | 0.58 |
| 31/2/04-52 | 0.00207 | -0.00210 | 0.01223 | 2.87525 | 2.24803 | 78.6 | 11.12 | 0.48 |
| 31/2/04-53 | 0.00120 | 0.01062 | 0.01205 | 2.27616 | 1.90802 | 84.4 | 9.44 | 0.49 |
| 31/2/04-54 | 0.00044 | 0.01537 | 0.01268 | 1.28642 | 1.14290 | 89.8 | 5.66 | 0.54 |
| 31/2/04-55 | 0.00091 | 0.01281 | 0.01238 | 2.08530 | 1.80343 | 87.1 | 8.93 | 0.35 |
| 31/2/04-56 | 0.00195 | 0.02347 | 0.01197 | 2.67400 | 2.08470 | 78.4 | 10.31 | 0.40 |
| 31/2/04-57 | 0.00109 | -0.00903 | 0.01213 | 2.64911 | 2.31294 | 87.8 | 11.44 | 0.50 |
| 31/2/04-58 | 0.00169 | -0.00534 | 0.01248 | 2.42203 | 1.90761 | 79.2 | 9.44 | 0.56 |
| 31/2/04-59 | 0.00048 | -0.00496 | 0.01255 | 2.05594 | 1.90039 | 93.1 | 9.40 | 1.09 |
| 31/2/04-60 | 0.00088 | -0.00044 | 0.01196 | 1.78688 | 1.51134 | 85.3 | 7.48 | 0.88 |
| 31/2/04-61 | 0.00163 | 0.01531 | 0.01301 | 2.66530 | 2.17082 | 81.9 | 10.74 | 0.39 |
| 31/2/04-62 | 0.00096 | -0.01288 | 0.01192 | 1.42106 | 1.12236 | 79.8 | 5.56 | 0.67 |
| 31/2/04-63 | 0.00068 | 0.00466 | 0.01173 | 1.90606 | 1.69027 | 89.4 | 8.37 | 0.56 |
| 31/2/04-64 | 0.00100 | 0.01882 | 0.01264 | 1.92007 | 1.61143 | 84.6 | 7.98 | 0.50 |
| 31/2/04-65 | 0.00022 | 0.00995 | 0.01106 | 2.98151 | 2.90255 | 97.8 | 14.34 | 0.64 |
| 31/2/04-66 | 0.00058 | -0.01516 | 0.01238 | 2.39763 | 2.21144 | 92.8 | 10.94 | 0.48 |
| 31/2/04-68 | 0.00189 | -0.00583 | 0.01111 | 3.22186 | 2.64721 | 82.5 | 13.09 | 0.74 |
| 31/2/04-69 | 0.00063 | 0.00348 | 0.01218 | 1.77193 | 1.57274 | 89.5 | 7.79 | 0.31 |
| 31/2/04-70 | 0.00017 | -0.00396 | 0.01181 | 2.17543 | 2.11125 | 97.7 | 10.44 | 0.35 |
| 31/2/04-71 | 0.00087 | 0.00541 | 0.01271 | 2.12070 | 1.84981 | 87.8 | 9.15 | 0.60 |
| 31/2/04-72 | 0.00048 | -0.00389 | 0.01192 | 2.12421 | 1.96770 | 93.3 | 9.74 | 0.58 |
| 31/2/04-73 | 0.00153 | -0.00981 | 0.01242 | 2.67735 | 2.21080 | 83.0 | 10.94 | 0.37 |
| 31/2/04-74 | 0.00008 | 0.00670 | 0.01299 | 2.61305 | 2.57451 | 99.1 | 13.05 | 0.70 |
| 31/2/04-75 | 0.00136 | -0.00490 | 0.01258 | 2.89932 | 2.48220 | 86.0 | 12.27 | 0.68 |
| 31/2/04-76 | 0.00085 | 0.01337 | 0.01219 | 2.05689 | 1.79179 | 87.7 | 8.87 | 0.42 |
| 31/2/04-77 | 0.00083 | -0.00696 | 0.01416 | 2.86857 | 2.60742 | 91.4 | 12.89 | 0.98 |
| 31/2/04-78 | 0.01126 | -0.01220 | 0.01372 | 4.64890 | 1.30682 | 28.2 | 6.47 | 0.42 |
| 31/2/04-79 | 0.00086 | -0.00477 | 0.01237 | 2.51956 | 2.25096 | 89.9 | 11.13 | 0.38 |
| 31/2/04-80 | 0.00103 | -0.00195 | 0.01297 | 1.91243 | 1.59472 | 84.0 | 7.89 | 0.90 |
| 31/2/04-81 | 0.00121 | 0.03165 | 0.01098 | 2.53331 | 2.16338 | 85.9 | 10.70 | 0.74 |
| 31/2/04-82 | 0.00041 | -0.00398 | 0.01198 | 2.55628 | 2.42049 | 95.2 | 11.97 | 0.46 |
| 31/2/04-83 | 0.00192 | -0.00050 | 0.01269 | 2.23264 | 1.64961 | 74.4 | 8.17 | 0.51 |
| 31/2/04-84 | 0.00046 | 0.00489 | 0.01230 | 1.74274 | 1.59321 | 92.2 | 7.89 | 0.47 |
| 31/2/04-86 | 0.00265 | -0.02856 | 0.01430 | 3.30860 | 2.50707 | 76.1 | 12.40 | 1.09 |
| 31/2/04-87 | 0.00019 | -0.01639 | 0.01411 | 1.97265 | 1.89915 | 97.0 | 9.40 | 0.61 |
| 31/2/04-88 | 0.00050 | 0.00452 | 0.01216 | 2.10045 | 1.94023 | 93.0 | 9.60 | 0.39 |
| 31/2/04-89 | 0.00495 | -0.00233 | 0.01242 | 3.38321 | 1.90631 | 56.6 | 9.43 | 0.33 |
| 31/2/04-90 | 0.00557 | 0.00090 | 0.01302 | 3.19743 | 1.53795 | 48.3 | 7.61 | 0.43 |
| 31/2/04-91 | 0.00137 | -0.09507 | 0.00887 | 3.16828 | 2.73811 | 86.8 | 13.53 | 2.50 |
| 31/2/04-92 | 0.00305 | -0.01206 | 0.01304 | 2.77284 | 1.85489 | 67.2 | 9.18 | 0.76 |
| 31/2/04-93 | 0.00219 | 0.01192 | 0.01213 | 3.36453 | 2.70526 | 80.7 | 13.37 | 0.69 |
| 31/2/04-94 | 0.00037 | 0.02899 | 0.01375 | 2.32886 | 2.20787 | 95.4 | 10.92 | 0.68 |
| 31/2/04-95 | 0.00358 | 0.00330 | 0.01426 | 4.30674 | 3.23529 | 75.4 | 15.98 | 1.84 |
| 31/2/04-96 | 0.00425 | 0.00236 | 0.01297 | 3.33895 | 2.06758 | 62.2 | 10.23 | 0.36 |
| 31/2/04-97 | 0.00943 | -0.00062 | 0.01315 | 6.08392 | 3.28296 | 54.1 | 16.21 | 0.63 |
| 31/2/04-99 | 0.00102 | 0.01081 | 0.01226 | 1.82617 | 1.51049 | 83.4 | 7.48 | 0.47 |
| 31/2/04-100 | 0.00028 | 0.02517 | 0.01338 | 3.79520 | 3.70112 | 97.9 | 18.27 | 1.24 |
| 31/2/04-101 | 0.00076 | -0.00899 | 0.01302 | 1.98786 | 1.74942 | 88.6 | 8.66 | 0.50 |
| 31/2/04-102 | 0.00114 | -0.01588 | 0.01220 | 2.34480 | 1.99095 | 85.4 | 9.85 | 0.74 |
| 31/2/04-103 | 0.00052 | 0.00478 | 0.01086 | 2.85555 | 2.68666 | 94.6 | 13.28 | 0.44 |
| 31/2/04-104 | 0.00173 | -0.00845 | 0.01295 | 2.70806 | 2.18187 | 81.0 | 10.79 | 0.49 |
| 31/2/04-105 | 0.00377 | 0.62647 | -0.07175 | 6.32000 | 5.26086 | 83.4 | 25.91 | 39.26 |
| 31/2/06-01 | 0.00036 | 0.01351 | 0.01187 | 2.04770 | 1.92729 | 94.8 | 9.54 | 0.33 |
| 31/2/06-02 | 0.00046 | -0.00077 | 0.01190 | 1.44696 | 1.29714 | 90.5 | 6.42 | 0.45 |
| 31/2/06-03 | 0.00243 | 0.00234 | 0.01304 | 3.05747 | 2.32629 | 76.4 | 11.50 | 0.34 |
| 31/2/06-04 | 0.00071 | -0.01278 | 0.01161 | 1.42463 | 1.19992 | 85.1 | 5.94 | 0.26 |
| 31/2/06-05 | 0.00387 | -0.00903 | 0.01214 | 3.63825 | 2.47979 | 68.4 | 12.26 | 0.43 |
| 31/2/06-06 | 0.00149 | -0.00885 | 0.01229 | 3.01720 | 2.56042 | 85.3 | 12.66 | 0.50 |
| 31/2/06-07 | 0.00043 | -0.00246 | 0.01183 | 1.58869 | 1.44630 | 91.9 | 7.16 | 0.28 |
| 31/2/06-08 | 0.00056 | 0.01338 | 0.01253 | 1.16421 | 0.98536 | 85.7 | 4.88 | 0.26 |
| 31/2/06-09 | 0.00160 | -0.00145 | 0.01267 | 2.21274 | 1.72402 | 78.4 | 8.53 | 0.31 |
| 31/2/06-10 | 0.00055 | 0.00829 | 0.01173 | 1.78709 | 1.61184 | 90.9 | 7.98 | 0.50 |
| 31/2/06-11 | 0.00009 | 0.01029 | 0.01166 | 2.44843 | 2.40837 | 98.9 | 11.91 | 0.40 |
| 31/2/06-12 | 0.00217 | 0.00497 | 0.01293 | 3.12864 | 2.47316 | 79.4 | 12.23 | 0.34 |
| 31/2/06-13 | 0.00013 | -0.00689 | 0.01263 | 2.24935 | 2.19527 | 98.2 | 10.86 | 0.53 |
| 31/2/06-14 | 0.00212 | 0.00341 | 0.01176 | 2.41474 | 1.77345 | 73.9 | 8.78 | 0.50 |
| 31/2/06-15 | 0.00070 | 0.00210 | 0.01246 | 2.17735 | 1.95697 | 90.5 | 9.68 | 0.36 |
| 31/2/06-16 | 0.00088 | 0.00669 | 0.01203 | 1.35646 | 1.08371 | 80.7 | 5.37 | 0.45 |
| 31/2/06-17 | 0.00048 | -0.00116 | 0.01151 | 2.50927 | 2.35252 | 94.3 | 11.93 | 0.78 |
| 31/2/06-18 | 0.00144 | 0.00427 | 0.01307 | 2.09807 | 1.65840 | 79.6 | 8.21 | 0.29 |
| 31/2/06-19 | 0.00018 | -0.01060 | 0.01160 | 1.96853 | 1.89983 | 97.2 | 9.64 | 0.51 |
| 31/2/06-20 | 0.00048 | 0.00034 | 0.01154 | 1.76885 | 1.61255 | 91.9 | 7.98 | 0.39 |
| 31/2/06-21 | 0.00020 | 0.01180 | 0.01211 | 3.30725 | 3.23441 | 98.2 | 16.38 | 0.45 |
| 31/2/06-22 | 0.00009 | 0.00270 | 0.01289 | 1.70869 | 1.66745 | 98.4 | 8.25 | 0.62 |
| 31/2/06-23 | 0.00104 | -0.02049 | 0.01231 | 3.05462 | 2.73117 | 89.8 | 13.50 | 0.46 |
| 31/2/06-24 | 0.00069 | -0.00475 | 0.01187 | 1.54793 | 1.32784 | 86.6 | 6.58 | 0.48 |
| 31/2/06-25 | 0.00030 | 0.01022 | 0.01212 | 1.96668 | 1.86587 | 95.6 | 9.23 | 0.39 |
| 31/2/06-26 | 0.00188 | -0.00282 | 0.01340 | 2.58850 | 2.01978 | 78.5 | 9.99 | 0.46 |
| 31/2/06-27 | 0.00088 | -0.00760 | 0.01235 | 3.02318 | 2.74671 | 91.3 | 13.58 | 0.40 |
| 31/2/06-28 | 0.00084 | 0.00210 | 0.01259 | 2.75411 | 2.49223 | 91.0 | 12.32 | 0.51 |
| 31/2/06-29 | 0.00481 | -0.01750 | 0.01298 | 3.64055 | 2.20321 | 60.8 | 10.90 | 0.36 |
| 31/2/06-30 | 0.00100 | 0.00768 | 0.01234 | 2.60052 | 2.29008 | 88.5 | 11.33 | 0.36 |
| 31/2/06-31 | 0.00048 | 0.02181 | 0.01206 | 2.10584 | 1.95236 | 93.3 | 9.66 | 0.45 |
| 31/2/06-32 | 0.00134 | 0.04426 | 0.01258 | 4.89362 | 4.48826 | 92.0 | 22.13 | 0.70 |
| 31/2/06-33 | 0.00183 | 0.02099 | 0.01188 | 1.91632 | 1.36290 | 71.7 | 6.75 | 0.79 |
| 31/2/06-34 | 0.00098 | 0.01864 | 0.01174 | 2.05195 | 1.75075 | 85.9 | 8.67 | 0.49 |
| 31/2/06-35 | 0.00086 | 0.03068 | 0.01269 | 2.47285 | 2.20743 | 89.8 | 10.92 | 0.50 |
| 31/2/06-36 | 0.00046 | -0.04695 | 0.01131 | 2.20921 | 2.05323 | 93.6 | 10.16 | 0.58 |
| 31/2/06-37 | 0.00667 | -0.00942 | 0.01412 | 3.97588 | 1.98812 | 50.2 | 9.84 | 0.45 |
| 31/2/06-38 | 0.00069 | -0.02113 | 0.01298 | 2.46913 | 2.24970 | 91.6 | 11.13 | 0.66 |
| 31/2/06-39 | 0.00069 | -0.02294 | 0.01198 | 2.40815 | 2.18796 | 91.4 | 10.82 | 0.65 |
| 31/2/06-40 | 0.00135 | 0.02027 | 0.01222 | 3.51522 | 3.10441 | 88.7 | 15.34 | 0.96 |
| 31/2/06-41 | 0.00337 | -0.00249 | 0.01138 | 2.32351 | 1.31369 | 56.9 | 6.51 | 0.67 |
| 31/2/06-42 | 0.00017 | 0.04073 | 0.01313 | 3.03573 | 2.97547 | 98.5 | 14.70 | 0.75 |
| 31/2/06-43 | 0.00088 | -0.00673 | 0.01267 | 2.64090 | 2.36577 | 90.1 | 11.70 | 0.52 |
| 31/2/06-45 | 0.00075 | 0.00666 | 0.01320 | 1.92842 | 1.69194 | 88.4 | 8.37 | 0.25 |
| 31/2/06-46 | 0.00062 | 0.03140 | 0.01228 | 2.59256 | 2.39833 | 93.0 | 11.86 | 0.47 |
| 31/2/06-47 | 0.00221 | 0.01599 | 0.01325 | 2.02109 | 1.35443 | 67.5 | 6.71 | 0.59 |
| 31/2/06-48 | 0.00029 | -0.04043 | 0.01127 | 1.57439 | 1.47007 | 94.2 | 7.28 | 0.80 |
| 31/2/06-49 | 0.00000 | -0.00348 | 0.01095 | 5.29180 | 5.27682 | 100.0 | 26.65 | 1.20 |
| 31/2/06-50 | 0.00143 | 0.00431 | 0.01232 | 2.18506 | 1.74811 | 80.5 | 8.65 | 0.51 |
| 31/2/06-51 | 0.00012 | -0.01363 | 0.01118 | 3.33413 | 3.28244 | 98.9 | 16.21 | 0.67 |
| 31/2/06-52 | 0.00001 | -0.01153 | 0.01198 | 1.73700 | 1.71994 | 99.8 | 8.51 | 0.44 |
| 31/2/06-53 | 0.00007 | -0.00738 | 0.01258 | 2.31610 | 2.27926 | 99.0 | 11.27 | 0.46 |
| 31/2/06-54 | 0.00132 | 0.04615 | 0.01415 | 2.80329 | 2.40293 | 86.2 | 11.88 | 0.90 |
| 31/2/06-55 | 0.00172 | 0.00703 | 0.01173 | 5.94101 | 5.41933 | 91.4 | 26.69 | 0.88 |
| 31/2/06-56 | 0.00097 | -0.00518 | 0.01241 | 3.44681 | 3.14386 | 91.6 | 15.53 | 0.52 |
| 31/2/06-57 | 0.00062 | 0.00532 | 0.01214 | 1.98183 | 1.78631 | 90.8 | 8.84 | 0.45 |
| 31/2/06-58 | 0.00111 | -0.03437 | 0.01198 | 1.89654 | 1.54921 | 82.3 | 7.67 | 0.76 |
| 31/2/06-59 | 0.00223 | -0.04079 | 0.01188 | 2.25478 | 1.57749 | 70.4 | 7.81 | 0.46 |
| 31/2/06-60 | 0.00118 | 0.01460 | 0.01251 | 2.55845 | 2.19757 | 86.4 | 10.87 | 0.32 |
| 31/2/06-61 | 0.00175 | 0.03205 | 0.01141 | 1.78360 | 1.25518 | 70.9 | 6.22 | 0.76 |
| 31/2/06-62 | 0.00193 | 0.04568 | 0.01112 | 3.00481 | 2.42603 | 81.1 | 12.00 | 1.03 |
| 31/2/06-63 | 0.00058 | 0.01946 | 0.01263 | 2.53027 | 2.34794 | 93.3 | 11.61 | 0.62 |
| 31/2/06-64 | 0.00114 | 0.01278 | 0.01276 | 2.03936 | 1.68875 | 83.4 | 8.36 | 0.42 |
| 31/2/06-65 | 0.00148 | 0.04353 | 0.01370 | 2.69691 | 2.24899 | 83.8 | 11.12 | 0.63 |
| 31/2/06-66 | 0.00062 | -0.00166 | 0.01266 | 1.90679 | 1.70983 | 90.3 | 8.46 | 0.62 |
| 31/2/06-67 | 0.00083 | 0.05973 | 0.01438 | 2.23851 | 1.98529 | 89.3 | 9.82 | 0.96 |
| 31/2/06-68 | 0.00010 | -0.00890 | 0.01147 | 3.71831 | 3.67496 | 99.2 | 18.14 | 0.62 |
| 31/2/06-69 | 0.00054 | 0.00273 | 0.01626 | 1.48872 | 1.31399 | 89.1 | 6.51 | 0.95 |
| 31/2/06-70 | 0.00192 | -0.02041 | 0.01446 | 3.73556 | 3.15267 | 84.7 | 15.97 | 0.69 |
| 31/2/06-71 | 0.00203 | -0.01069 | 0.01311 | 2.04017 | 1.42432 | 70.3 | 7.05 | 0.70 |
| 31/2/06-72 | 0.01259 | 0.05543 | 0.01891 | 5.43924 | 1.70977 | 31.5 | 8.46 | 1.50 |
| 31/2/06-73 | 0.00218 | 0.00355 | 0.01251 | 2.73805 | 2.07963 | 76.4 | 10.29 | 1.09 |
| 31/2/06-74 | 0.00096 | 0.01878 | 0.01036 | 1.84016 | 1.54401 | 84.6 | 7.64 | 1.01 |
| 31/2/06-75 | 0.00074 | 0.01112 | 0.01187 | 1.89288 | 1.66166 | 88.5 | 8.23 | 0.48 |
| 31/2/06-76 | 0.00044 | 0.00433 | 0.01222 | 2.38760 | 2.24275 | 94.5 | 11.09 | 0.56 |
| 31/2/06-77 | 0.00058 | -0.00470 | 0.01503 | 3.24839 | 3.06111 | 94.7 | 15.12 | 0.69 |
| 31/2/06-78 | 0.00079 | -0.00878 | 0.01212 | 2.00280 | 1.75535 | 88.3 | 8.69 | 0.43 |
| 31/2/06-79 | 0.00024 | -0.01000 | 0.01129 | 1.50698 | 1.42163 | 95.2 | 7.22 | 1.02 |
| 31/2/06-80 | 0.00244 | 0.00848 | 0.01216 | 2.76584 | 2.03241 | 73.9 | 10.06 | 0.33 |
| 31/2/06-81 | 0.00076 | 0.01701 | 0.01217 | 2.16673 | 1.93063 | 89.7 | 9.55 | 0.60 |
| 31/2/06-82 | 0.00602 | -0.01489 | 0.01347 | 3.21079 | 1.41492 | 44.3 | 7.01 | 0.72 |
| 31/2/06-83 | 0.00026 | 0.00169 | 0.01002 | 1.40045 | 1.30861 | 94.4 | 6.48 | 0.94 |
| 31/2/06-84 | 0.00177 | 0.01716 | 0.01332 | 1.83698 | 1.30103 | 71.4 | 6.44 | 0.44 |
| 31/2/06-85 | 0.00063 | -0.03375 | 0.01392 | 2.05422 | 1.85011 | 90.7 | 9.39 | 1.66 |
| 31/2/06-87 | 0.00080 | -0.00011 | 0.01318 | 2.14149 | 1.88942 | 88.8 | 9.35 | 0.49 |
| 31/2/06-88 | 0.01135 | 0.06226 | 0.01470 | 5.69770 | 2.33612 | 41.1 | 11.55 | 0.47 |
| 31/2/06-89 | 0.00174 | 0.00020 | 0.01390 | 2.64314 | 2.11573 | 80.5 | 10.47 | 0.65 |
| 31/2/06-90 | 0.00047 | 0.02703 | 0.01294 | 2.09586 | 1.94655 | 93.5 | 9.63 | 0.56 |
| 31/2/06-91 | 0.00137 | 0.05054 | 0.01188 | 2.34069 | 1.92568 | 82.8 | 9.77 | 0.50 |
| 31/2/06-92 | 0.00169 | 0.02067 | 0.01264 | 3.33684 | 2.82522 | 85.0 | 13.96 | 1.11 |
| 31/2/06-93 | 0.00127 | -0.01407 | 0.01303 | 3.10768 | 2.71709 | 87.8 | 13.43 | 1.19 |
| 31/2/06-94 | 0.00225 | 0.02649 | 0.01354 | 2.21301 | 1.53742 | 69.9 | 7.61 | 0.94 |
| 31/2/06-95 | 0.00089 | -0.03130 | 0.01220 | 2.60896 | 2.32894 | 89.8 | 11.52 | 1.53 |
| 31/2/06-96 | 0.00107 | 0.01756 | 0.01176 | 2.37350 | 2.04394 | 86.6 | 10.11 | 0.75 |
| 31/2/06-97 | 0.00033 | 0.01300 | 0.01090 | 2.19245 | 2.08299 | 95.6 | 10.30 | 1.27 |
| 31/2/06-98 | 0.00351 | 0.01556 | 0.01257 | 2.48543 | 1.43407 | 58.0 | 7.10 | 0.58 |
| 31/2/06-99 | 0.00139 | 0.00661 | 0.01247 | 2.87134 | 2.44715 | 85.7 | 12.10 | 0.53 |

**Table A5 Single crystal data, MO-217**

| **Run ID** | **36/39 Cor** | **37/39 Cor** | **38/39 Cor** | **40/39 Cor** | **40*/39** | **%40*** | **Age** | **±** |
| --- | --- | --- | --- | --- | --- | --- | --- | --- |
| 31/2/13-01 | 0.00128 | 0.00985 | 0.02036 | 8.01467 | 7.62283 | 95.3 | 36.89 | 2.60 |
| 31/2/13-02 | 0.00062 | 0.00167 | 0.01694 | 4.33717 | 4.13926 | 95.8 | 20.12 | 1.06 |
| 31/2/13-03 | 0.00028 | -0.00019 | 0.01582 | 2.25183 | 2.15445 | 96.3 | 10.50 | 0.29 |
| 31/2/13-04 | 0.00200 | 0.00122 | 0.01627 | 4.42053 | 3.81609 | 86.6 | 18.56 | 0.81 |
| 31/2/13-05 | 0.00002 | 0.00211 | 0.01382 | 4.63303 | 4.61367 | 99.9 | 22.42 | 1.03 |
| 31/2/13-07 | 0.00083 | -0.00009 | 0.01293 | 1.35266 | 1.09383 | 81.7 | 5.34 | 0.94 |
| 31/2/13-08 | 0.00023 | 0.10972 | 0.01437 | 1.22324 | 1.15188 | 95.3 | 5.62 | 0.32 |
| 31/2/13-09 | 0.00021 | -0.00030 | 0.01597 | 4.15532 | 4.07826 | 98.5 | 19.83 | 0.92 |
| 31/2/13-11 | 0.00019 | -0.00122 | 0.01393 | 2.13655 | 2.06729 | 97.4 | 10.08 | 0.60 |
| 31/2/13-12 | 0.00376 | -0.00170 | 0.01619 | 1.40984 | 0.28571 | 20.5 | 1.40 | 1.08 |
| 31/2/13-13 | 0.00021 | 0.00005 | 0.01590 | 1.88414 | 1.80861 | 96.7 | 8.82 | 0.51 |
| 31/2/13-14 | 0.00373 | -0.01033 | 0.01524 | 3.25135 | 2.13311 | 65.9 | 10.40 | 1.91 |
| 31/2/13-15 | 0.00198 | 0.00065 | 0.01384 | 1.94070 | 1.34279 | 69.7 | 6.55 | 0.52 |
| 31/2/13-16 | 0.00447 | -0.00245 | 0.01856 | 3.73140 | 2.39694 | 64.5 | 11.68 | 0.82 |
| 31/2/13-17 | 0.00469 | -0.01935 | 0.01681 | 2.54959 | 1.14594 | 45.2 | 5.59 | 4.06 |
| 31/2/13-18 | 0.00025 | -0.00195 | 0.01724 | 1.39473 | 1.30684 | 94.7 | 6.38 | 0.64 |
| 31/2/13-19 | 0.00047 | -0.00332 | 0.01381 | 1.59011 | 1.43726 | 91.2 | 7.01 | 0.57 |
| 31/2/13-20 | 0.00092 | -0.00444 | 0.01497 | 4.07867 | 3.79255 | 93.3 | 18.45 | 1.00 |
| 31/2/13-21 | 0.00187 | -0.00025 | 0.01631 | 1.63784 | 1.07164 | 66.0 | 5.23 | 0.58 |
| 31/2/13-22 | 0.00232 | -0.00246 | 0.01643 | 4.71888 | 4.01820 | 85.4 | 19.54 | 0.90 |
| 31/2/13-23 | 0.00140 | -0.00461 | 0.01643 | 1.94847 | 1.51917 | 78.5 | 7.41 | 2.92 |
| 31/2/13-25 | 0.00312 | -0.00517 | 0.01657 | 3.07939 | 2.14248 | 69.9 | 10.44 | 1.56 |
| 31/2/13-26 | 0.00027 | -0.00204 | 0.01818 | 5.44346 | 5.34916 | 98.5 | 25.96 | 1.09 |
| 31/2/13-27 | 0.00174 | -0.00610 | 0.01388 | 2.65921 | 2.12895 | 80.5 | 10.38 | 1.43 |
| 31/2/13-28 | 0.00055 | 0.00018 | 0.01611 | 2.92642 | 2.75029 | 94.4 | 13.40 | 1.28 |
| 31/2/13-29 | 0.00224 | 0.00080 | 0.01822 | 3.74287 | 3.06648 | 82.2 | 14.93 | 0.99 |
| 31/2/13-30 | 0.00209 | 0.00112 | 0.01671 | 1.30644 | 0.67530 | 52.3 | 3.30 | 1.16 |
| 31/2/13-31 | 0.00141 | -0.00161 | 0.01213 | 1.89645 | 1.46655 | 77.9 | 7.16 | 0.71 |
| 31/2/13-32 | 0.00159 | 0.00087 | 0.01339 | 1.87670 | 1.39158 | 74.7 | 6.79 | 0.34 |
| 31/2/13-33 | 0.00005 | 0.00323 | 0.01676 | 7.93824 | 7.90993 | 99.8 | 38.26 | 1.23 |
| 31/2/13-34 | 0.00219 | 0.00216 | 0.01398 | 3.95017 | 3.28842 | 83.6 | 16.01 | 0.92 |
| 31/2/13-35 | 0.00049 | 0.00227 | 0.01476 | 1.89565 | 1.73755 | 92.4 | 8.48 | 0.44 |
| 31/2/13-36 | 0.00258 | 0.00205 | 0.01430 | 1.33120 | 0.55530 | 42.2 | 2.71 | 0.72 |
| 31/2/13-37 | 0.00098 | -0.00029 | 0.01488 | 2.62371 | 2.32028 | 88.9 | 11.31 | 0.74 |
| 31/2/13-38 | 0.00040 | 0.00354 | 0.01853 | 2.64595 | 2.51485 | 95.6 | 12.25 | 1.68 |
| 31/2/13-39 | 0.00266 | 0.00249 | 0.01663 | 3.28104 | 2.48120 | 76.0 | 12.09 | 0.88 |
| 31/2/13-40 | 0.00871 | 0.00616 | 0.01500 | 3.61934 | 1.03308 | 28.7 | 5.04 | 4.57 |
| 31/2/13-41 | 0.00292 | 0.00051 | 0.01709 | 2.70827 | 1.83143 | 68.0 | 8.93 | 1.03 |
| 31/2/13-42 | 0.00181 | -0.00044 | 0.01658 | 1.50136 | 0.95106 | 64.0 | 4.64 | 0.66 |
| 31/2/13-43 | 0.00072 | -0.01325 | 0.01913 | 4.32589 | 4.09816 | 95.1 | 19.93 | 3.88 |
| 31/2/13-44 | 0.00163 | 0.00590 | 0.01640 | 3.23999 | 2.74525 | 85.1 | 13.37 | 0.70 |
| 31/2/13-45 | 0.00001 | -0.00465 | 0.01522 | 2.04153 | 2.02273 | 99.8 | 9.86 | 1.00 |
| 31/2/13-46 | 0.00397 | -0.00228 | 0.01419 | 4.10960 | 2.92326 | 71.4 | 14.24 | 1.04 |
| 31/2/13-47 | 0.00383 | -0.00967 | 0.01355 | 2.08514 | 0.93930 | 45.4 | 4.59 | 1.29 |
| 31/2/13-48 | 0.00134 | -0.00545 | 0.01570 | 2.23315 | 1.82289 | 82.2 | 8.89 | 1.27 |
| 31/2/13-49 | 0.00308 | 0.01274 | 0.01404 | 1.57285 | 0.64849 | 41.6 | 3.17 | 1.56 |
| 31/2/13-50 | 0.00023 | 0.00162 | 0.01552 | 3.41675 | 3.33432 | 98.0 | 16.23 | 0.80 |
| 31/2/13-51 | 0.00174 | 0.00342 | 0.01648 | 2.92863 | 2.39976 | 82.3 | 11.69 | 0.97 |
| 31/2/13-52 | 0.00355 | 0.00105 | 0.01348 | 1.77185 | 0.70870 | 40.3 | 3.46 | 0.79 |
| 31/2/13-53 | 0.00098 | 0.00219 | 0.01668 | 3.06201 | 2.75690 | 90.5 | 13.43 | 0.73 |
| 31/2/13-54 | 0.00115 | 0.00216 | 0.01539 | 2.07101 | 1.71650 | 83.5 | 8.37 | 1.82 |
| 31/2/13-55 | 0.00206 | -0.00004 | 0.01580 | 1.66114 | 1.03807 | 63.0 | 5.07 | 0.43 |
| 31/2/13-57 | 0.00238 | -0.00240 | 0.01664 | 1.64704 | 0.93057 | 57.0 | 4.54 | 1.78 |
| 31/2/13-58 | 0.00034 | 0.01361 | 0.01727 | 1.15278 | 1.03877 | 91.2 | 5.07 | 0.80 |
| 31/2/13-59 | 0.00008 | -0.00134 | 0.01352 | 1.61489 | 1.57812 | 98.6 | 7.70 | 0.58 |
| 31/2/13-60 | 0.00145 | -0.00374 | 0.01519 | 1.85450 | 1.41009 | 76.6 | 6.88 | 1.36 |
| 31/2/13-62 | 0.00152 | -0.00455 | 0.01718 | 3.04217 | 2.57880 | 85.2 | 12.56 | 1.99 |
| 31/2/13-63 | 0.00053 | -0.00063 | 0.01348 | 1.26104 | 1.09146 | 87.5 | 5.33 | 0.68 |
| 31/2/13-64 | 0.00120 | -0.00225 | 0.01591 | 3.62133 | 3.25217 | 90.2 | 15.83 | 1.63 |
| 31/2/13-65 | 0.00013 | 0.00171 | 0.01835 | 1.34433 | 1.29213 | 97.2 | 6.31 | 0.81 |
| 31/2/13-66 | 0.00149 | 0.00355 | 0.01579 | 1.06787 | 0.61419 | 58.3 | 3.00 | 0.90 |
| 31/2/13-67 | 0.00037 | 0.00987 | 0.01689 | 1.71287 | 1.59169 | 93.7 | 7.77 | 1.47 |
| 31/2/13-68 | 0.00029 | 0.00287 | 0.01694 | 1.53629 | 1.43680 | 94.4 | 7.01 | 0.30 |
| 31/2/13-69 | 0.00082 | -0.00188 | 0.01673 | 2.73023 | 2.47307 | 91.1 | 12.05 | 0.92 |
| 31/2/13-70 | 0.00197 | -0.00240 | 0.01597 | 2.59882 | 2.00300 | 77.5 | 9.77 | 1.04 |
| 31/2/13-71 | 0.00127 | -0.00460 | 0.01636 | 2.45332 | 2.06206 | 84.5 | 10.05 | 1.01 |
| 31/2/13-72 | 0.00003 | 0.00062 | 0.01648 | 2.13397 | 2.11097 | 99.6 | 10.29 | 1.22 |
| 31/2/13-73 | 0.00393 | 0.00186 | 0.01820 | 3.93954 | 2.76428 | 70.4 | 13.46 | 0.93 |
| 31/2/13-74 | 0.00019 | -0.00156 | 0.01591 | 2.03922 | 1.96716 | 97.1 | 9.59 | 0.61 |
| 31/2/13-75 | 0.00134 | -0.00086 | 0.01818 | 2.18391 | 1.77223 | 81.7 | 8.64 | 0.33 |
| 31/2/13-76 | 0.00060 | -0.00264 | 0.01513 | 3.68208 | 3.49135 | 95.2 | 16.99 | 0.68 |
| 31/2/13-77 | 0.00331 | 0.00217 | 0.01354 | 1.84027 | 0.84809 | 46.4 | 4.14 | 1.97 |
| 31/2/13-78 | 0.00061 | -0.00020 | 0.01593 | 4.07151 | 3.87550 | 95.5 | 18.85 | 1.97 |
| 31/2/13-79 | 0.00178 | 0.00011 | 0.01578 | 2.67514 | 2.13460 | 80.2 | 10.41 | 0.85 |
| 31/2/13-80 | 0.00054 | -0.00099 | 0.01526 | 1.19094 | 1.01812 | 86.5 | 4.97 | 0.67 |
| 31/2/13-81 | 0.00054 | -0.00039 | 0.01617 | 1.97455 | 1.79991 | 91.8 | 8.78 | 0.43 |
| 31/2/13-82 | 0.00048 | -0.00006 | 0.01655 | 4.54323 | 4.38584 | 96.8 | 21.32 | 0.72 |
| 31/2/13-83 | 0.00387 | -0.00041 | 0.01532 | 1.90989 | 0.75294 | 39.7 | 3.68 | 1.41 |
| 31/2/13-84 | 0.00078 | -0.00096 | 0.01686 | 2.94155 | 2.69588 | 92.1 | 13.13 | 0.66 |
| 31/2/13-85 | 0.00066 | 0.00250 | 0.01783 | 2.68155 | 2.47228 | 92.7 | 12.05 | 0.86 |
| 31/2/13-86 | 0.00069 | 0.00803 | 0.01731 | 3.66251 | 3.44470 | 94.4 | 16.76 | 1.40 |
| 31/2/13-87 | 0.00267 | 0.00046 | 0.01592 | 3.31577 | 2.51238 | 76.1 | 12.24 | 0.36 |
| 31/2/13-88 | 0.00575 | 0.00610 | 0.01667 | 2.23937 | 0.52754 | 23.7 | 2.58 | 2.51 |
| 31/2/13-89 | 0.00102 | 0.00007 | 0.01548 | 1.80952 | 1.49482 | 83.3 | 7.29 | 1.44 |
| 31/2/13-90 | 0.00067 | 0.00054 | 0.01470 | 2.44161 | 2.22947 | 91.9 | 10.87 | 0.65 |
| 31/2/13-91 | 0.00076 | 0.00105 | 0.01580 | 1.60773 | 1.36937 | 85.9 | 6.68 | 1.12 |
| 31/2/13-92 | 0.00079 | 0.00005 | 0.01583 | 1.78134 | 1.53264 | 86.7 | 7.48 | 0.24 |
| 31/2/13-93 | 0.00046 | -0.00154 | 0.01516 | 1.79203 | 1.64244 | 92.4 | 8.01 | 0.94 |
| 31/2/13-94 | 0.00016 | -0.00582 | 0.01684 | 3.92044 | 3.85831 | 98.8 | 18.77 | 2.00 |
| 31/2/13-95 | 0.00241 | -0.00031 | 0.01315 | 3.93764 | 3.21034 | 81.8 | 15.63 | 2.34 |
| 31/2/13-97 | 0.00104 | -0.00264 | 0.01532 | 2.43241 | 2.11093 | 87.3 | 10.29 | 1.77 |
| 31/2/13-98 | 0.00153 | -0.00025 | 0.01709 | 2.80005 | 2.33403 | 83.8 | 11.38 | 0.84 |
| 31/2/13-99 | 0.00190 | -0.00243 | 0.01470 | 2.21938 | 1.64206 | 74.5 | 8.01 | 1.24 |
| 31/2/13-100 | 0.00145 | -0.00004 | 0.01413 | 2.84766 | 2.40366 | 84.8 | 11.71 | 1.19 |
| 31/2/13-101 | 0.00009 | -0.00226 | 0.01554 | 3.47381 | 3.43306 | 99.2 | 16.71 | 1.30 |
| 31/2/13-102 | 0.00003 | 0.00018 | 0.01465 | 3.58259 | 3.55967 | 99.8 | 17.32 | 1.28 |
| 31/2/13-103 | 0.00139 | 0.00024 | 0.01381 | 2.18787 | 1.76223 | 81.1 | 8.60 | 0.58 |
| 31/2/13-104 | 0.00175 | -0.00364 | 0.01819 | 3.31583 | 2.78290 | 84.3 | 13.55 | 1.71 |
| 31/2/13-105 | 0.00179 | -0.00073 | 0.01487 | 2.28261 | 1.73889 | 76.7 | 8.48 | 1.42 |
| 31/2/13-106 | 0.00514 | 0.00170 | 0.01464 | 2.54535 | 1.01373 | 40.1 | 4.95 | 1.75 |
| 31/2/13-107 | 0.00230 | 0.00023 | 0.02083 | 4.81368 | 4.11908 | 85.8 | 20.03 | 1.50 |
| 31/2/13-108 | 0.00163 | -0.02519 | 0.01848 | 5.60863 | 5.11092 | 91.4 | 24.82 | 5.44 |
| 31/2/13-109 | 0.00053 | -0.00081 | 0.01658 | 2.77731 | 2.60704 | 94.4 | 12.70 | 0.82 |
| 31/2/13-110 | 0.00130 | -0.00127 | 0.01492 | 3.00533 | 2.60568 | 87.1 | 12.69 | 0.76 |
| 31/2/13-111 | 0.00098 | -0.00054 | 0.01429 | 1.38009 | 1.07486 | 78.7 | 5.25 | 1.34 |
| 31/2/13-114 | 0.00301 | 0.00232 | 0.01734 | 4.51273 | 3.60887 | 80.2 | 17.56 | 1.48 |
| 31/2/13-115 | 0.00054 | 0.00042 | 0.01644 | 3.82523 | 3.65235 | 95.8 | 17.77 | 1.21 |
| 31/2/13-116 | 0.00028 | -0.00126 | 0.01634 | 2.99632 | 2.89904 | 97.2 | 14.12 | 0.88 |
| 31/2/13-117 | 0.00042 | 0.00183 | 0.01686 | 1.84887 | 1.70932 | 93.2 | 8.34 | 2.13 |
| 31/2/13-118 | 0.00000 | -0.00111 | 0.01882 | 3.40502 | 3.38923 | 100.0 | 16.49 | 0.59 |
| 31/2/13-119 | 0.00206 | -0.00344 | 0.01533 | 2.38061 | 1.75651 | 74.2 | 8.57 | 1.29 |
| 31/2/13-120 | 0.00145 | -0.00011 | 0.01623 | 2.52047 | 2.07827 | 82.9 | 10.13 | 1.69 |
| 31/2/13-121 | 0.00372 | 0.00417 | 0.01576 | 3.72691 | 2.61278 | 70.4 | 12.73 | 1.39 |
| 31/2/13-122 | 0.00301 | 0.00280 | 0.01501 | 1.41325 | 0.50833 | 36.3 | 2.48 | 1.79 |
| 31/2/13-124 | 0.00082 | -0.00333 | 0.01442 | 3.73259 | 3.47667 | 93.5 | 16.92 | 2.29 |
| 31/2/13-125 | 0.00110 | 0.00069 | 0.01377 | 1.91863 | 1.57902 | 82.9 | 7.70 | 0.57 |
| 31/2/13-126 | 0.00005 | 0.00016 | 0.01649 | 2.44758 | 2.41711 | 99.3 | 11.78 | 0.41 |
| 31/2/13-127 | 0.00192 | -0.00136 | 0.01610 | 4.32000 | 3.73932 | 86.8 | 18.19 | 1.10 |
| 31/2/13-128 | 0.00106 | 0.00044 | 0.01651 | 2.51007 | 2.18174 | 87.4 | 10.64 | 1.19 |
| 31/2/13-129 | 0.00632 | 0.00200 | 0.01281 | 11.20818 | 9.32673 | 83.3 | 45.03 | 3.96 |
| 31/2/13-133 | 0.00334 | 0.00713 | 0.01556 | 2.97287 | 1.97320 | 66.7 | 9.62 | 1.54 |
| 31/2/13-134 | 0.00254 | -0.00091 | 0.01498 | 1.97987 | 1.21441 | 61.8 | 5.93 | 0.73 |
| 31/2/13-135 | 0.00489 | 0.00160 | 0.01293 | 2.15187 | 0.69179 | 32.4 | 3.38 | 0.71 |
| 31/2/13-136 | 0.00501 | 0.00217 | 0.01490 | 2.02854 | 0.53484 | 26.6 | 2.61 | 1.07 |
| 31/2/13-137 | 0.00734 | 0.00610 | 0.01585 | 3.82824 | 1.64642 | 43.2 | 8.03 | 1.12 |
| 31/2/13-138 | 0.00535 | 0.00578 | 0.01813 | 3.47082 | 1.87569 | 54.3 | 9.15 | 3.07 |
| 31/2/13-139 | 0.00090 | 0.00011 | 0.01707 | 2.94317 | 2.66413 | 91.0 | 12.98 | 0.57 |
| 31/2/13-142 | 0.00020 | 0.00175 | 0.01412 | 2.51410 | 2.44018 | 97.6 | 11.89 | 1.52 |
| 31/2/13-145 | 0.00108 | -0.00554 | 0.01565 | 3.64336 | 3.30825 | 91.2 | 16.10 | 2.74 |
| 31/2/13-146 | 0.00000 | 0.00162 | 0.01516 | 2.47418 | 2.45921 | 100.0 | 11.98 | 0.59 |
| 31/2/13-147 | 0.00018 | -0.00293 | 0.01478 | 4.82024 | 4.75108 | 98.9 | 23.08 | 2.23 |
| 31/2/13-148 | 0.01044 | -0.00582 | 0.01504 | 3.91125 | 0.81119 | 20.8 | 3.96 | 3.04 |
| 31/2/13-149 | 0.00511 | -0.00312 | 0.01520 | 2.08071 | 0.55588 | 26.9 | 2.72 | 1.31 |
| 31/2/13-150 | 0.00322 | -0.00313 | 0.01613 | 2.63151 | 1.66449 | 63.6 | 8.12 | 2.62 |
| 31/2/13-151 | 0.00785 | -0.00428 | 0.01528 | 4.51137 | 2.17790 | 48.4 | 10.62 | 1.96 |
| 31/2/13-153 | 0.00893 | 0.00060 | 0.01658 | 3.49854 | 0.84592 | 24.3 | 4.13 | 1.09 |
| 31/2/13-154 | 0.00243 | 0.00078 | 0.01673 | 6.71889 | 5.98767 | 89.3 | 29.04 | 1.89 |
| 31/2/13-155 | 0.00378 | -0.00993 | 0.01458 | 3.54185 | 2.40895 | 68.3 | 11.74 | 2.81 |
| 31/2/13-156 | 0.00671 | -0.00058 | 0.01573 | 4.20524 | 2.20892 | 52.7 | 10.77 | 0.81 |
| 31/2/13-157 | 0.00537 | 0.00487 | 0.01856 | 4.65341 | 3.05370 | 65.8 | 14.87 | 3.14 |
| 31/2/13-158 | 0.00069 | 0.00953 | 0.01631 | 1.66863 | 1.45023 | 87.7 | 7.08 | 3.96 |
| 31/2/13-159 | 0.00093 | 0.00211 | 0.01864 | 1.28532 | 0.99622 | 78.4 | 4.86 | 1.92 |
| 31/2/13-160 | 0.00613 | 0.00203 | 0.01499 | 2.69496 | 0.86962 | 32.4 | 4.25 | 3.08 |
| 31/2/13-161 | 0.00080 | 0.00256 | 0.01774 | 3.42892 | 3.17912 | 93.1 | 15.48 | 3.56 |
| 31/2/13-162 | 0.00054 | 0.00644 | 0.01713 | 2.34768 | 2.17419 | 93.2 | 10.60 | 3.06 |
| 31/2/13-163 | 0.00005 | -0.00158 | 0.01477 | 4.79733 | 4.76887 | 99.7 | 23.17 | 1.18 |
| 31/2/13-164 | 0.00149 | -0.00080 | 0.01553 | 3.01774 | 2.56429 | 85.4 | 12.49 | 2.63 |
| 31/2/13-165 | 0.00457 | 0.00429 | 0.01489 | 3.31904 | 1.95519 | 59.2 | 9.53 | 3.20 |
| 31/2/13-166 | 0.00481 | 0.00272 | 0.01553 | 3.96608 | 2.52965 | 64.0 | 12.33 | 2.01 |
| 31/2/13-167 | 0.00220 | 0.00523 | 0.01519 | 2.05305 | 1.38913 | 68.1 | 6.78 | 0.98 |
| 31/2/13-169 | 0.00236 | 0.00717 | 0.01654 | 1.34726 | 0.63564 | 47.7 | 3.11 | 0.85 |
| 31/2/13-170 | 0.00610 | 0.00164 | 0.01663 | 3.87593 | 2.05903 | 53.3 | 10.04 | 1.48 |
| 31/2/13-171 | 0.00335 | 0.00189 | 0.01521 | 2.46590 | 1.46039 | 59.6 | 7.13 | 1.23 |
| 31/2/13-172 | 0.00260 | 0.00602 | 0.01697 | 3.16793 | 2.38626 | 75.7 | 11.63 | 2.66 |
| 31/2/13-173 | 0.00263 | -0.00093 | 0.01891 | 2.46644 | 1.67379 | 68.3 | 8.16 | 3.44 |
| 31/2/13-175 | 0.00048 | -0.00921 | 0.01611 | 2.87737 | 2.71888 | 95.0 | 13.24 | 4.77 |
| 31/2/13-178 | 0.00773 | 0.00088 | 0.01703 | 5.72850 | 3.43066 | 60.0 | 16.70 | 4.87 |
| 31/2/13-179 | 0.00165 | 0.00010 | 0.01607 | 2.50109 | 1.99809 | 80.3 | 9.74 | 2.44 |
| 31/2/13-180 | 0.00074 | -0.00237 | 0.01646 | 1.90764 | 1.67313 | 88.4 | 8.16 | 2.50 |
| 31/2/13-182 | 0.00088 | 0.00120 | 0.01918 | 3.47135 | 3.19704 | 92.5 | 15.56 | 0.44 |
| 31/2/13-185 | 0.00581 | -0.00717 | 0.01677 | 4.75323 | 3.02005 | 63.7 | 14.71 | 3.50 |
| 31/2/13-187 | 0.00316 | -0.00038 | 0.01717 | 3.84532 | 2.89607 | 75.6 | 14.10 | 1.96 |
| 31/2/13-188 | 0.00154 | 0.00274 | 0.01748 | 6.38446 | 5.91636 | 92.9 | 28.70 | 2.30 |
| 31/2/13-189 | 0.00061 | 0.00424 | 0.01654 | 2.11935 | 1.92614 | 91.5 | 9.39 | 1.84 |
| 31/2/13-190 | 0.00010 | -0.00112 | 0.01445 | 1.27052 | 1.22786 | 97.7 | 5.99 | 0.95 |
| 31/2/13-191 | 0.00256 | -0.00023 | 0.01535 | 3.81370 | 3.04360 | 80.1 | 14.82 | 2.44 |
| 31/2/13-192 | 0.00022 | 0.01268 | 0.01463 | 2.99842 | 2.92168 | 97.9 | 14.23 | 3.02 |
| 31/2/13-193 | 0.00029 | 0.00325 | 0.01556 | 2.43356 | 2.33531 | 96.5 | 11.38 | 0.89 |
| 31/2/13-194 | 0.00914 | 0.01198 | 0.01682 | 4.42256 | 1.70875 | 38.8 | 8.33 | 7.01 |
| 31/2/13-196 | 0.00398 | -0.00024 | 0.01612 | 6.57721 | 5.38826 | 82.1 | 26.15 | 1.34 |
| 31/2/13-197 | 0.00210 | 0.00798 | 0.01438 | 3.19223 | 2.55714 | 80.5 | 12.46 | 1.91 |
| 31/2/13-198 | 0.00286 | 0.01792 | 0.01573 | 6.18168 | 5.32420 | 86.3 | 25.84 | 4.95 |
| 31/2/13-199 | 0.00181 | -0.00055 | 0.01528 | 3.77687 | 3.22799 | 85.8 | 15.71 | 1.49 |
| 31/2/13-200 | 0.00011 | -0.00247 | 0.01476 | 4.15543 | 4.10774 | 99.2 | 19.97 | 2.04 |
| 31/2/13-202 | 0.00227 | 0.00370 | 0.01841 | 4.02558 | 3.33945 | 83.3 | 16.25 | 2.15 |
| 31/2/13-203 | 0.00002 | -0.00135 | 0.01575 | 1.50956 | 1.49017 | 99.7 | 7.27 | 1.73 |
| 31/2/13-204 | 0.00552 | -0.00184 | 0.01624 | 3.52312 | 1.87747 | 53.5 | 9.16 | 4.94 |

**Table A6, Single crystal data, Guy-2**

| **Run ID** | **36/39 Cor** | **37/39 Cor** | **38/39 Cor** | **40/39 Cor** | **40*/39** | **%40*** | **Age** | **±** |
| --- | --- | --- | --- | --- | --- | --- | --- | --- |
| 22/2/7-05A | 0.00007 | 0.00270 | 0.01444 | 1.40322 | 1.35064 | 98.6 | 16.14 | 0.97 |
| 22/2/7-06A | 0.00032 | 0.00005 | 0.01285 | 0.77162 | 0.64500 | 87.4 | 7.73 | 0.61 |
| 22/2/7-07A | 0.00244 | 0.00304 | 0.01359 | 1.92446 | 1.16988 | 61.9 | 13.99 | 0.85 |
| 22/2/7-09A | 0.00004 | 0.00049 | 0.01258 | 0.39840 | 0.35207 | 96.4 | 4.22 | 0.37 |
| 22/2/7-10A | 0.00001 | -0.00028 | 0.01258 | 1.14940 | 1.11191 | 99.6 | 13.30 | 0.90 |
| 22/2/7-11A | 0.00005 | -0.00324 | 0.01235 | 0.79971 | 0.74994 | 97.9 | 8.98 | 0.96 |
| 22/2/7-12A | 0.00091 | 0.00176 | 0.01292 | 0.81462 | 0.51197 | 65.5 | 6.14 | 0.39 |
| 22/2/7-13A | 0.00034 | 0.04915 | 0.01298 | 0.85948 | 0.72996 | 88.4 | 8.74 | 0.57 |
| 22/2/7-14A | 0.00097 | 0.00248 | 0.01306 | 1.13438 | 0.81556 | 74.1 | 9.77 | 0.85 |
| 22/2/7-15A | 0.00131 | 0.03605 | 0.01356 | 0.74770 | 0.33076 | 46.3 | 3.97 | 1.06 |
| 22/2/7-16A | 0.00010 | 0.00509 | 0.01472 | 1.19325 | 1.12940 | 97.4 | 13.51 | 0.83 |
| 22/2/7-17A | 0.00033 | 0.00326 | 0.01261 | 0.76271 | 0.63104 | 86.5 | 7.56 | 0.71 |
| 22/2/7-19A | 0.00068 | 0.00715 | 0.01276 | 0.84504 | 0.61118 | 75.3 | 7.32 | 0.98 |
| 22/2/7-20A | 0.00034 | 0.01265 | 0.01279 | 0.89167 | 0.75803 | 88.3 | 9.08 | 0.69 |
| 22/2/7-21A | 0.00269 | 0.02599 | 0.01457 | 1.62525 | 0.79887 | 50.2 | 9.57 | 2.79 |
| 22/2/7-22A | 0.00021 | 0.00503 | 0.01268 | 0.76513 | 0.66863 | 91.4 | 8.01 | 0.52 |
| 22/2/7-23A | 0.00016 | 0.00266 | 0.01263 | 1.32421 | 1.24468 | 96.4 | 14.88 | 0.97 |
| 22/2/7-24A | 0.00003 | 0.00259 | 0.01250 | 0.73349 | 0.69097 | 98.7 | 8.28 | 0.57 |
| 22/2/7-25A | 0.00036 | 0.00113 | 0.01272 | 0.85711 | 0.71847 | 87.2 | 8.61 | 0.55 |
| 22/2/7-26A | 0.00150 | 0.00056 | 0.01254 | 1.15307 | 0.67536 | 60.3 | 8.09 | 0.69 |
| 22/2/7-27A | 0.00054 | -0.00027 | 0.01259 | 1.21436 | 1.02274 | 86.6 | 12.24 | 1.53 |
| 22/2/7-28A | 0.00023 | 0.00393 | 0.01265 | 0.61992 | 0.52019 | 88.7 | 6.23 | 0.47 |
| 22/2/7-29A | 0.00016 | 0.00152 | 0.01275 | 0.73830 | 0.65822 | 93.4 | 7.89 | 0.51 |
| 22/2/7-30A | 0.00091 | -0.00219 | 0.01234 | 0.99877 | 0.69509 | 72.0 | 8.33 | 0.58 |
| 22/2/7-31A | 0.00083 | -0.00660 | 0.01248 | 1.69046 | 1.41269 | 85.3 | 16.88 | 1.85 |
| 22/2/7-32A | 0.00003 | 0.10857 | 0.01274 | 0.71630 | 0.68197 | 99.8 | 8.17 | 0.57 |
| 22/2/7-33A | 0.00014 | 0.00713 | 0.01312 | 1.18667 | 1.11335 | 96.5 | 13.32 | 0.88 |
| 22/2/7-34A | 0.00002 | -0.00012 | 0.01251 | 0.96210 | 0.92417 | 99.5 | 11.06 | 0.69 |
| 22/2/7-35A | 0.00054 | 0.00560 | 0.01318 | 0.97819 | 0.78706 | 83.3 | 9.42 | 0.61 |
| 22/2/7-36A | 0.00017 | 0.00288 | 0.01252 | 0.79765 | 0.71487 | 93.5 | 8.56 | 0.62 |
| 22/2/7-37A | 0.00017 | 0.09664 | 0.01284 | 0.69150 | 0.61393 | 93.3 | 7.36 | 0.48 |
| 22/2/7-38A | 0.00098 | 0.00541 | 0.01303 | 1.04904 | 0.72643 | 71.5 | 8.70 | 0.69 |
| 22/2/7-39A | 0.00006 | 0.01496 | 0.01265 | 0.95200 | 0.90229 | 98.2 | 10.80 | 0.90 |
| 22/2/7-40A | 0.00008 | 0.03876 | 0.01265 | 0.61932 | 0.56579 | 96.6 | 6.78 | 0.68 |
| 22/2/7-42A | 0.00047 | 0.00093 | 0.01263 | 0.79722 | 0.62435 | 81.7 | 7.48 | 0.62 |
| 22/2/7-43A | 0.00094 | 0.00330 | 0.01282 | 0.94059 | 0.63000 | 69.4 | 7.55 | 0.52 |
| 22/2/7-44A | 0.00151 | 0.00088 | 0.01302 | 1.09767 | 0.61795 | 58.1 | 7.40 | 0.74 |
| 22/2/7-45A | 0.00078 | -0.00152 | 0.01331 | 1.57982 | 1.31619 | 85.1 | 15.73 | 0.99 |
| 22/2/7-46A | 0.00014 | -0.00676 | 0.01205 | 1.03321 | 0.95944 | 96.0 | 11.48 | 1.16 |
| 22/2/7-47A | 0.00117 | 0.03173 | 0.01302 | 0.95805 | 0.58096 | 62.8 | 6.96 | 0.46 |
| 22/2/7-48A | 0.00024 | -0.00530 | 0.01326 | 1.18615 | 1.08202 | 93.9 | 12.94 | 1.79 |
| 22/2/7-49A | 0.00022 | 0.05147 | 0.01274 | 0.87218 | 0.77847 | 92.8 | 9.32 | 0.59 |
| 22/2/7-50A | 0.00010 | 0.08046 | 0.01316 | 0.75507 | 0.69718 | 96.6 | 8.35 | 0.72 |
| 22/2/7-51A | 0.00078 | 0.07452 | 0.01281 | 1.62949 | 1.37156 | 85.9 | 16.39 | 1.04 |
| 22/2/7-52A | 0.00023 | 0.00483 | 0.01275 | 0.71541 | 0.61376 | 90.0 | 7.35 | 0.50 |
| 22/2/7-53A | 0.00041 | 0.01946 | 0.01303 | 1.12280 | 0.97036 | 89.1 | 11.61 | 0.75 |
| 22/2/7-54A | 0.00240 | 0.00302 | 0.01307 | 0.92363 | 0.18150 | 20.4 | 2.18 | 0.62 |
| 22/2/7-55A | 0.00047 | 0.00405 | 0.01274 | 0.73887 | 0.56656 | 80.3 | 6.79 | 0.49 |
| 22/2/7-56A | 0.00045 | 0.00764 | 0.01265 | 0.73615 | 0.57175 | 81.4 | 6.85 | 0.62 |
| 22/2/7-57A | 0.00014 | 0.00859 | 0.01283 | 0.63762 | 0.56248 | 93.1 | 6.74 | 0.42 |
| 22/2/7-58A | 0.00137 | 0.06977 | 0.01303 | 1.10608 | 0.67224 | 62.7 | 8.05 | 0.58 |
| 22/2/7-59A | 0.00031 | 0.00277 | 0.01270 | 0.60973 | 0.48371 | 83.9 | 5.80 | 0.36 |
| 22/2/7-60A | 0.00228 | 0.00843 | 0.01291 | 1.24421 | 0.53653 | 44.3 | 6.43 | 0.80 |
| 22/2/7-61A | 0.00257 | 0.01921 | 0.01379 | 1.16979 | 0.37805 | 33.3 | 4.53 | 3.09 |
| 22/2/7-62A | 0.00007 | 0.01217 | 0.01216 | 0.80043 | 0.74728 | 97.4 | 8.95 | 0.85 |
| 22/2/7-63A | 0.00159 | 0.01338 | 0.01193 | 0.91065 | 0.40786 | 46.5 | 4.89 | 1.04 |
| 22/2/7-64A | 0.00050 | 0.00629 | 0.01203 | 0.74087 | 0.56026 | 79.2 | 6.71 | 0.93 |
| 22/2/7-65A | 0.00076 | 0.09127 | 0.01214 | 0.79016 | 0.53846 | 71.1 | 6.45 | 1.05 |
| 22/2/7-66A | 0.00039 | 0.00553 | 0.01273 | 0.89236 | 0.74544 | 86.8 | 8.93 | 0.57 |
| 22/2/7-67A | 0.00021 | -0.00936 | 0.01198 | 1.60603 | 1.51097 | 96.1 | 18.05 | 1.89 |
| 22/2/7-68A | 0.00006 | 0.00357 | 0.01256 | 0.80261 | 0.75069 | 97.6 | 8.99 | 0.81 |
| 22/2/7-70A | 0.00032 | 0.00260 | 0.01288 | 0.93775 | 0.81086 | 89.7 | 9.71 | 0.61 |
| 22/2/7-71A | 0.00006 | 0.02827 | 0.01304 | 0.89946 | 0.84900 | 98.0 | 10.16 | 0.86 |
| 22/2/7-72A | 0.00001 | -0.00429 | 0.01217 | 0.64762 | 0.61239 | 99.7 | 7.34 | 1.23 |
| 22/2/7-73A | 0.00051 | 0.00285 | 0.01209 | 0.82272 | 0.63803 | 80.8 | 7.64 | 1.04 |
| 22/2/7-74A | 0.00131 | -0.00843 | 0.01224 | 0.87877 | 0.45879 | 54.3 | 5.50 | 1.11 |
| 22/2/7-75A | 0.00184 | 0.00175 | 0.01201 | 0.93083 | 0.35264 | 39.3 | 4.23 | 1.53 |
| 22/2/7-76A | 0.00010 | 0.00956 | 0.01219 | 0.74471 | 0.68152 | 95.8 | 8.16 | 1.02 |
| 22/2/7-77A | 0.00060 | 0.00834 | 0.01206 | 0.76587 | 0.55473 | 75.7 | 6.65 | 1.67 |
| 22/2/7-78A | 0.00100 | 0.01092 | 0.01214 | 1.13220 | 0.80337 | 73.1 | 9.62 | 1.75 |
| 22/2/7-79A | 0.00485 | 0.00059 | 0.01322 | 2.00573 | 0.53782 | 27.3 | 6.45 | 1.47 |
| 22/2/7-80A | 0.00001 | 0.00294 | 0.01258 | 0.66014 | 0.62317 | 99.4 | 7.47 | 0.47 |
| 22/2/7-81A | 0.00008 | -0.00377 | 0.01178 | 0.56367 | 0.50668 | 95.5 | 6.07 | 0.99 |
| 22/2/7-82A | 0.00003 | 0.02092 | 0.01265 | 0.60495 | 0.56484 | 98.8 | 6.77 | 0.72 |
| 22/2/7-83A | 0.00076 | 0.25993 | 0.01398 | 0.85706 | 0.61503 | 74.6 | 7.37 | 0.68 |
| 22/2/7-84A | 0.00012 | -0.00207 | 0.01270 | 0.83363 | 0.76415 | 95.5 | 9.15 | 1.53 |
| 22/2/7-85A | 0.00407 | 0.01598 | 0.01377 | 1.74124 | 0.50648 | 29.7 | 6.07 | 1.97 |
| 22/2/7-86A | 0.00011 | -0.00454 | 0.01279 | 0.97092 | 0.90367 | 96.4 | 10.82 | 1.42 |
| 22/2/7-87A | 0.00090 | -0.00096 | 0.01333 | 1.03071 | 0.73133 | 73.3 | 8.76 | 2.46 |
| 22/2/7-88A | 0.00007 | 0.00389 | 0.01284 | 0.77288 | 0.71894 | 97.2 | 8.61 | 0.80 |
| 22/2/7-89A | 0.00028 | 0.00426 | 0.01248 | 0.96661 | 0.85051 | 91.1 | 10.18 | 1.16 |
| 22/2/7-90A | 0.00041 | 0.00262 | 0.01259 | 1.05321 | 0.89894 | 88.1 | 10.76 | 0.92 |
| 22/2/7-91A | 0.00010 | -0.00130 | 0.01237 | 0.76626 | 0.70180 | 95.8 | 8.41 | 0.79 |
| 22/2/7-92A | 0.00007 | 0.00893 | 0.01256 | 1.24019 | 1.18722 | 98.4 | 14.20 | 0.89 |
| 22/2/7-93A | 0.00161 | 0.00147 | 0.01301 | 1.24788 | 0.73747 | 60.7 | 8.83 | 0.91 |
| 22/2/7-94A | 0.00116 | 0.00178 | 0.01217 | 0.99913 | 0.62238 | 64.4 | 7.46 | 0.61 |
| 22/2/7-95A | 0.00005 | 0.00742 | 0.01271 | 0.60708 | 0.55872 | 97.4 | 6.70 | 0.96 |
| 22/2/7-96A | 0.00006 | -0.00870 | 0.01160 | 0.85538 | 0.80306 | 97.7 | 9.62 | 1.23 |
| 22/2/7-97A | 0.00008 | 0.04197 | 0.01310 | 52.44841 | 52.39897 | 100.0 | 539.69 | 28.04 |
| 22/2/7-98A | 0.00394 | 0.02656 | 0.01231 | 1.47575 | 0.28129 | 19.5 | 3.37 | 3.76 |
| 22/2/7-99A | 0.00003 | -0.00126 | 0.01236 | 0.64306 | 0.59951 | 98.3 | 7.18 | 0.91 |
| 22/2/7-100A | 0.00169 | 0.00901 | 0.01278 | 0.98596 | 0.45324 | 47.6 | 5.43 | 1.84 |
| 22/2/7-101A | 0.00016 | 0.00960 | 0.01291 | 0.66500 | 0.58501 | 92.6 | 7.01 | 0.43 |
| 22/2/7-102A | 0.00052 | 0.00389 | 0.01305 | 0.77312 | 0.58519 | 79.1 | 7.01 | 0.46 |
| 22/2/7-103A | 0.00003 | 0.02335 | 0.01224 | 0.52077 | 0.48139 | 98.8 | 5.77 | 0.45 |
| 22/2/7-104A | 0.00353 | 0.00043 | 0.01257 | 1.29283 | 0.21554 | 17.1 | 2.59 | 1.37 |
| 22/2/7-106A | 0.00004 | 0.00347 | 0.01208 | 0.75302 | 0.70945 | 98.6 | 8.50 | 0.89 |
| 22/2/7-107A | 0.00056 | -0.00278 | 0.01247 | 1.02232 | 0.82321 | 83.2 | 9.86 | 0.87 |
| 22/2/7-108A | 0.00022 | 0.00372 | 0.01254 | 0.87208 | 0.77529 | 92.4 | 9.28 | 0.90 |
| 22/2/7-109A | 0.00060 | 0.00791 | 0.01197 | 0.78345 | 0.57253 | 76.3 | 6.86 | 1.09 |
| 22/2/7-110A | 0.00074 | 0.00853 | 0.01234 | 0.78080 | 0.52954 | 70.8 | 6.35 | 0.68 |
| 22/2/7-111A | 0.00078 | 0.01250 | 0.01267 | 0.87412 | 0.61166 | 72.7 | 7.33 | 0.56 |
| 22/2/7-112A | 0.00012 | 0.00053 | 0.01216 | 0.98287 | 0.91362 | 96.2 | 10.94 | 1.18 |
| 22/2/7-113A | 0.00009 | -0.00688 | 0.01320 | 0.78021 | 0.72069 | 96.5 | 8.63 | 1.18 |
| 22/2/7-114A | 0.00303 | 0.00425 | 0.01315 | 1.62037 | 0.69157 | 43.6 | 8.28 | 0.53 |

**Table A7 Single crystal data, NAG-12**

| **Run ID** | **36/39 Cor** | **37/39 Cor** | **38/39 Cor** | **40/39 Cor** | **40*/39** | **%40*** | **Age** | **±** |
| --- | --- | --- | --- | --- | --- | --- | --- | --- |
| 31/1/03-01 | 0.00013 | 0.00247 | 0.01335 | 3.12173 | 3.07062 | 98.8 | 14.84 | 0.59 |
| 31/1/03-02 | 0.00017 | 0.00117 | 0.01240 | 3.01518 | 2.95086 | 98.3 | 14.26 | 0.45 |
| 31/1/03-03 | 0.00065 | 0.00511 | 0.01296 | 2.94117 | 2.73414 | 93.4 | 13.22 | 0.38 |
| 31/1/03-04 | 0.00234 | 0.00213 | 0.01380 | 3.24262 | 2.53728 | 78.6 | 9.13 | 0.36 |
| 31/1/03-05 | 0.00102 | 0.00217 | 0.01441 | 3.62125 | 3.30456 | 91.6 | 15.97 | 0.66 |
| 31/1/03-06 | 0.00014 | 0.00265 | 0.01273 | 3.70624 | 3.65203 | 98.9 | 17.64 | 0.53 |
| 31/1/03-07 | 0.00009 | 0.00470 | 0.01330 | 4.71914 | 4.67845 | 99.4 | 16.80 | 0.55 |
| 31/1/03-08 | 0.00044 | 0.00214 | 0.01326 | 3.63277 | 3.48765 | 96.4 | 12.54 | 0.40 |
| 31/1/03-09 | 0.00085 | 0.00209 | 0.01405 | 4.52468 | 4.25935 | 94.4 | 15.30 | 0.50 |
| 31/1/03-10 | 0.00022 | 0.00328 | 0.01564 | 3.77233 | 3.69220 | 98.2 | 17.83 | 0.47 |
| 31/1/03-11 | 0.00236 | 0.00734 | 0.01352 | 2.62695 | 1.91509 | 73.3 | 9.27 | 3.54 |
| 31/1/03-12 | 0.00032 | 0.00434 | 0.01357 | 1.71283 | 1.60528 | 94.5 | 5.78 | 0.22 |
| 31/1/03-13 | 0.00006 | 0.00110 | 0.01394 | 4.39431 | 4.36209 | 99.6 | 15.67 | 0.51 |
| 31/1/03-14 | 0.00049 | 0.00586 | 0.01455 | 3.08301 | 2.92396 | 95.3 | 14.24 | 1.15 |
| 31/1/03-15 | 0.00423 | 0.00548 | 0.01435 | 5.58162 | 4.31772 | 77.6 | 15.51 | 0.58 |
| 31/1/03-16 | 0.00014 | 0.00481 | 0.01374 | 4.31823 | 4.26444 | 99.1 | 15.32 | 0.61 |
| 31/1/03-17 | 0.00036 | 0.00184 | 0.01461 | 3.60688 | 3.48643 | 97.0 | 12.54 | 0.41 |
| 31/1/03-18 | 0.00149 | 0.00516 | 0.01363 | 3.06953 | 2.61526 | 85.6 | 12.65 | 0.62 |
| 31/1/03-19 | 0.00056 | 0.00849 | 0.01274 | 3.38033 | 3.20171 | 95.1 | 15.47 | 0.90 |
| 31/1/03-20 | 0.00141 | 0.00605 | 0.01293 | 4.34163 | 3.91067 | 90.4 | 18.88 | 0.60 |
| 31/1/03-21 | 0.00102 | 0.00162 | 0.01334 | 3.38179 | 3.06488 | 91.0 | 14.81 | 0.46 |
| 31/1/03-22 | 0.00017 | 0.00219 | 0.01365 | 1.45716 | 1.39320 | 96.6 | 6.75 | 0.34 |
| 31/1/03-23 | 0.00007 | 0.00121 | 0.01338 | 3.25787 | 3.22169 | 99.3 | 11.59 | 0.37 |
| 31/1/03-24 | 0.00042 | 0.00307 | 0.01439 | 3.72342 | 3.58447 | 96.6 | 12.89 | 0.45 |
| 31/1/03-25 | 0.00114 | 0.00034 | 0.01408 | 2.91813 | 2.56632 | 88.4 | 9.24 | 0.32 |
| 31/1/03-26 | 0.00037 | 0.00106 | 0.01343 | 4.00962 | 3.88676 | 97.3 | 18.76 | 0.69 |
| 31/1/03-27 | 0.00029 | 0.00100 | 0.01305 | 3.36006 | 3.26140 | 97.5 | 15.76 | 0.53 |
| 31/1/03-28 | 0.00062 | 0.00246 | 0.01349 | 1.81751 | 1.61999 | 89.8 | 7.84 | 0.32 |
| 31/1/03-29 | 0.00013 | 0.00287 | 0.01325 | 3.63767 | 3.58502 | 98.9 | 17.31 | 0.57 |
| 31/1/03-30 | 0.00007 | 0.01184 | 0.01445 | 3.73201 | 3.69925 | 99.5 | 13.30 | 0.45 |
| 31/1/03-31 | 0.00054 | 0.03658 | 0.01330 | 3.00827 | 2.83878 | 94.8 | 10.21 | 0.36 |
| 31/1/03-32 | 0.00198 | 0.01257 | 0.01733 | 4.62907 | 4.03174 | 87.4 | 14.49 | 0.51 |
| 31/1/03-33 | 0.00043 | 0.00378 | 0.01571 | 2.68339 | 2.54160 | 95.2 | 9.15 | 0.31 |
| 31/1/03-34 | 0.00075 | 0.00776 | 0.01293 | 3.32852 | 3.09415 | 93.4 | 14.95 | 0.59 |
| 31/1/03-36 | 0.00138 | 0.01597 | 0.01364 | 3.29760 | 2.87578 | 87.6 | 10.35 | 0.37 |
| 31/1/03-37 | 0.00056 | 0.00018 | 0.01414 | 3.73689 | 3.55613 | 95.5 | 12.79 | 0.48 |
| 31/1/03-38 | 0.00058 | -0.00159 | 0.01461 | 4.42278 | 4.23796 | 96.1 | 15.23 | 0.54 |
| 31/1/03-39 | 0.00020 | -0.00258 | 0.01424 | 2.78882 | 2.71535 | 97.9 | 9.77 | 0.44 |
| 31/1/03-40 | 0.00167 | -0.00057 | 0.01389 | 4.21648 | 3.70901 | 88.3 | 13.33 | 0.45 |
| 31/1/03-41 | 0.00053 | 0.00016 | 0.01336 | 2.76982 | 2.59827 | 94.3 | 9.35 | 0.32 |
| 31/1/03-42 | 0.00124 | 0.00172 | 0.01387 | 3.51449 | 3.13386 | 89.5 | 11.27 | 0.40 |
| 31/1/03-43 | 0.00141 | 0.00357 | 0.01327 | 3.40133 | 2.97088 | 87.7 | 10.69 | 0.34 |
| 31/1/03-44 | 0.00126 | 0.00480 | 0.01342 | 2.42534 | 2.04007 | 84.6 | 7.35 | 0.25 |
| 31/1/03-45 | 0.00048 | 0.00177 | 0.01451 | 3.06004 | 2.90419 | 95.4 | 10.45 | 0.45 |
| 31/1/03-46 | 0.00148 | 0.00321 | 0.01448 | 4.62385 | 4.17345 | 90.5 | 15.00 | 0.52 |
| 31/1/03-47 | 0.00065 | 0.00288 | 0.01409 | 3.99896 | 3.79431 | 95.2 | 13.64 | 0.43 |
| 31/1/03-48 | 0.00025 | 0.00656 | 0.01485 | 2.82166 | 2.73458 | 97.4 | 9.84 | 0.48 |
| 31/1/03-49 | 0.00079 | 0.00199 | 0.01334 | 4.08750 | 3.84051 | 94.3 | 13.80 | 0.46 |
| 31/1/03-50 | 0.00102 | 0.00091 | 0.01386 | 4.02041 | 3.70405 | 92.5 | 13.32 | 0.42 |
| 31/1/03-51 | 0.00127 | 0.00693 | 0.01374 | 4.90866 | 4.51973 | 92.3 | 16.23 | 0.55 |
| 31/1/03-52 | 0.00231 | 0.01191 | 0.01410 | 5.44593 | 4.75006 | 87.5 | 17.06 | 0.63 |
| 31/1/03-53 | 0.00200 | 0.00126 | 0.01450 | 4.99401 | 4.38967 | 88.2 | 21.18 | 0.88 |
| 31/1/03-54 | 0.00068 | 0.01149 | 0.01395 | 2.97390 | 2.75861 | 93.2 | 13.34 | 0.37 |
| 31/1/03-55 | 0.00048 | 0.00655 | 0.01322 | 4.28668 | 4.13071 | 96.7 | 19.94 | 0.79 |
| 31/1/03-56 | 0.00040 | 0.00723 | 0.01300 | 4.15745 | 4.02507 | 97.1 | 19.43 | 0.61 |
| 31/1/03-57 | 0.00085 | 0.00242 | 0.01358 | 2.93634 | 2.67142 | 91.4 | 12.92 | 0.46 |
| 31/1/03-58 | 0.00094 | 0.00669 | 0.01582 | 3.62920 | 3.33663 | 92.3 | 12.00 | 0.54 |
| 31/1/03-59 | 0.00189 | 0.00303 | 0.01332 | 4.43169 | 3.85991 | 87.4 | 13.87 | 0.51 |
| 31/1/03-60 | 0.00244 | 0.00211 | 0.01401 | 3.97183 | 3.23814 | 81.8 | 11.65 | 0.38 |
| 31/1/03-61 | 0.00169 | 0.00204 | 0.01431 | 4.30869 | 3.79464 | 88.4 | 13.64 | 0.48 |
| 31/1/03-62 | 0.00359 | 0.00594 | 0.01398 | 3.79184 | 2.71761 | 71.9 | 9.78 | 0.36 |
| 31/1/03-63 | 0.00134 | 0.00617 | 0.01404 | 3.77126 | 3.36040 | 89.4 | 12.08 | 0.40 |
| 31/1/03-64 | 0.00220 | 0.02113 | 0.01344 | 4.04899 | 3.38715 | 83.9 | 12.18 | 0.51 |
| 31/1/03-65 | 0.00165 | 0.00078 | 0.01323 | 3.74244 | 3.24128 | 86.9 | 11.66 | 0.41 |
| 31/1/03-66 | 0.00504 | 0.00271 | 0.01769 | 4.53246 | 3.03038 | 67.1 | 10.90 | 0.50 |
| 31/1/03-67 | 0.00591 | 0.00438 | 0.01586 | 4.77102 | 3.01060 | 63.3 | 10.83 | 0.41 |
| 31/1/03-68 | 0.00812 | 0.00999 | 0.01526 | 3.97260 | 1.56075 | 39.4 | 5.62 | 0.55 |
| 31/1/03-69 | 0.00124 | 0.00163 | 0.01315 | 2.60800 | 2.22727 | 85.9 | 8.02 | 0.29 |
| 31/1/03-70 | 0.00100 | 0.00473 | 0.01203 | 4.04509 | 3.73467 | 92.7 | 13.43 | 0.50 |
| 31/1/03-71 | 0.00115 | 0.00251 | 0.01299 | 4.06428 | 3.71180 | 91.7 | 13.34 | 0.44 |
| 31/1/03-72 | 0.00618 | 0.02620 | 0.01385 | 3.35520 | 1.51763 | 45.4 | 5.47 | 0.46 |
| 31/1/03-73 | 0.00051 | -0.00036 | 0.01481 | 3.42835 | 3.26343 | 95.6 | 11.74 | 0.54 |
| 31/1/03-74 | 0.00016 | 0.00168 | 0.01353 | 2.99823 | 2.93565 | 98.4 | 14.19 | 0.41 |
| 31/1/03-75 | 0.00024 | 0.00426 | 0.01376 | 3.67911 | 3.59349 | 98.1 | 12.92 | 0.47 |
| 31/1/03-76 | 0.00017 | 0.00623 | 0.01386 | 3.47742 | 3.41224 | 98.5 | 16.48 | 0.82 |
| 31/1/03-77 | 0.00059 | 0.00233 | 0.01305 | 3.21813 | 3.02906 | 94.5 | 10.90 | 0.35 |
| 31/1/03-79 | 0.00599 | 0.01873 | 0.01487 | 4.03342 | 2.25135 | 56.0 | 8.10 | 0.36 |
| 31/1/03-81 | 0.00102 | 0.00167 | 0.01357 | 3.03874 | 2.72227 | 90.0 | 9.80 | 0.34 |
| 31/1/03-82 | 0.00252 | 0.00584 | 0.01474 | 3.94442 | 3.18683 | 81.1 | 11.46 | 0.61 |
| 31/1/03-83 | 0.00127 | 0.00327 | 0.01397 | 3.73655 | 3.34630 | 89.9 | 12.03 | 0.38 |
| 31/1/03-84 | 0.00218 | 0.01474 | 0.01364 | 3.76368 | 3.10703 | 82.9 | 11.18 | 0.48 |
| 31/1/03-85 | 0.00107 | 0.00482 | 0.01395 | 3.15632 | 2.82679 | 90.0 | 10.17 | 0.44 |
| 31/1/03-86 | 0.00117 | 0.00407 | 0.01417 | 3.75661 | 3.39800 | 90.8 | 12.22 | 0.51 |
| 31/1/03-87 | 0.00085 | 0.00613 | 0.01437 | 3.89289 | 3.62881 | 93.6 | 13.05 | 0.56 |
| 31/1/03-88 | 0.00098 | 0.00737 | 0.01313 | 4.58513 | 4.28060 | 93.7 | 15.38 | 0.63 |
| 31/1/03-89 | 0.00090 | 0.00042 | 0.01362 | 2.66826 | 2.38921 | 90.0 | 8.60 | 0.41 |
| 31/1/03-90 | 0.00073 | 0.00179 | 0.01362 | 3.93306 | 3.70175 | 94.5 | 13.31 | 0.43 |
| 31/1/03-91 | 0.00512 | 0.01286 | 0.01489 | 2.80583 | 1.27889 | 45.8 | 4.61 | 0.51 |
| 31/1/03-92 | 0.00221 | 0.00509 | 0.01486 | 3.53585 | 2.86805 | 81.4 | 10.32 | 0.39 |
| 31/1/03-93 | 0.00082 | -0.00124 | 0.01384 | 3.97504 | 3.71878 | 93.9 | 13.37 | 0.50 |
| 31/1/03-94 | 0.00082 | 0.00095 | 0.01347 | 4.12276 | 3.86492 | 94.1 | 13.89 | 0.47 |
| 31/1/03-95 | 0.00046 | 0.00283 | 0.01358 | 3.89893 | 3.75035 | 96.5 | 18.11 | 0.49 |
| 31/1/03-96 | 0.00018 | 0.00545 | 0.01389 | 2.89061 | 2.82343 | 98.2 | 13.65 | 0.57 |
| 31/1/03-99 | 0.00473 | 0.01597 | 0.01447 | 4.17490 | 2.76455 | 66.4 | 9.95 | 0.48 |
| 31/1/03-100 | 0.00924 | 0.02180 | 0.01537 | 3.29345 | 0.55019 | 16.8 | 1.98 | 0.63 |
| 31/1/03-101 | 0.00179 | 0.00010 | 0.01424 | 3.40970 | 2.86565 | 84.4 | 13.85 | 0.91 |
| 31/1/03-102 | 0.00196 | 0.00003 | 0.01495 | 3.17938 | 2.58476 | 81.7 | 9.30 | 0.59 |
| 31/1/03-103 | 0.00218 | -0.00757 | 0.01560 | 5.25616 | 4.59631 | 87.7 | 16.51 | 1.13 |
| 31/1/03-104 | 0.00064 | -0.00339 | 0.01471 | 4.18124 | 3.97834 | 95.5 | 14.30 | 0.65 |
| 31/1/03-105 | 0.00059 | 0.00322 | 0.01414 | 4.67909 | 4.49047 | 96.3 | 21.66 | 0.73 |
| 31/1/03-106 | 0.00152 | 0.00322 | 0.01371 | 3.26686 | 2.80456 | 86.2 | 10.09 | 0.46 |
| 31/1/03-107 | 0.00117 | 0.00503 | 0.01340 | 4.09478 | 3.73637 | 91.6 | 18.04 | 0.96 |
| 31/1/03-108 | 0.00308 | 0.00517 | 0.01491 | 3.74851 | 2.82393 | 75.6 | 13.65 | 0.50 |
| 31/1/03-109 | 0.00073 | 0.00071 | 0.01384 | 3.79183 | 3.56283 | 94.3 | 16.95 | 0.72 |
| 31/1/03-110 | 0.00184 | 0.00216 | 0.01358 | 3.30934 | 2.75007 | 83.5 | 9.90 | 0.43 |
| 31/1/03-111 | 0.00037 | 0.00374 | 0.01383 | 3.94060 | 3.81879 | 97.3 | 13.73 | 0.61 |
| 31/1/03-112 | 0.00207 | -0.00101 | 0.01510 | 1.88558 | 1.26084 | 67.4 | 4.54 | 1.37 |
| 31/1/03-113 | 0.00068 | 0.00234 | 0.01372 | 3.80719 | 3.59115 | 94.7 | 12.91 | 0.52 |
| 31/1/03-114 | 0.00455 | 0.00459 | 0.01464 | 5.78925 | 4.43010 | 76.7 | 15.91 | 0.67 |
| 31/1/03-116 | 0.01064 | -0.00069 | 0.01701 | 3.76615 | 0.60621 | 16.2 | 2.19 | 0.90 |
| 31/1/03-117 | 0.00288 | 0.00168 | 0.01451 | 4.57573 | 3.71190 | 81.4 | 17.92 | 0.83 |
| 31/1/03-118 | 0.00057 | 0.00156 | 0.01418 | 5.96691 | 5.78412 | 97.2 | 27.85 | 0.95 |
| 31/1/03-119 | 0.00165 | 0.00393 | 0.01489 | 5.04356 | 4.54114 | 90.3 | 21.90 | 1.28 |
| 31/1/03-120 | 0.00864 | 0.00222 | 0.01449 | 6.14614 | 3.57996 | 58.4 | 12.87 | 0.41 |
| 31/1/03-121 | 0.00134 | 0.00222 | 0.01347 | 5.27342 | 4.86228 | 92.5 | 23.44 | 0.99 |
| 31/1/03-122 | 0.00567 | 0.00906 | 0.01385 | 4.91443 | 3.22481 | 65.8 | 15.58 | 1.99 |
| 31/1/03-123 | 0.01089 | 0.00006 | 0.01535 | 4.60201 | 1.37060 | 29.9 | 6.69 | 2.93 |
| 31/1/03-124 | 0.00387 | -0.00232 | 0.01484 | 5.21810 | 4.06132 | 78.0 | 14.59 | 0.90 |
| 31/1/03-125 | 0.00348 | 0.00093 | 0.01418 | 3.68098 | 2.63814 | 71.9 | 9.49 | 0.88 |
| 31/1/05-05 | 0.00129 | 0.00253 | 0.01477 | 2.67671 | 2.28031 | 85.6 | 11.48 | 0.37 |
| 31/1/05-06 | 0.00531 | 0.03065 | 0.01481 | 4.79296 | 3.21210 | 67.2 | 16.15 | 1.44 |
| 31/1/05-07 | 0.00030 | 0.00246 | 0.01569 | 3.17986 | 3.07592 | 97.2 | 15.47 | 0.42 |
| 31/1/05-08 | 0.00416 | 0.00361 | 0.01583 | 4.24454 | 3.00214 | 71.0 | 15.10 | 0.65 |
| 31/1/05-09 | 0.00360 | 0.00366 | 0.01607 | 4.42467 | 3.34827 | 75.9 | 16.83 | 0.61 |
| 31/1/05-10 | 0.00088 | 0.00139 | 0.01391 | 3.87636 | 3.60082 | 93.2 | 18.10 | 0.44 |
| 31/1/05-11 | 0.00184 | 0.00345 | 0.01491 | 5.18964 | 4.63323 | 89.5 | 23.25 | 0.62 |
| 31/1/05-12 | 0.00114 | 0.00382 | 0.01373 | 3.46304 | 3.11270 | 90.3 | 15.66 | 0.47 |
| 31/1/05-13 | 0.00212 | 0.00386 | 0.01566 | 4.35966 | 3.71814 | 85.6 | 18.68 | 0.51 |
| 31/1/05-14 | 0.00198 | 0.00618 | 0.01392 | 2.96422 | 2.36473 | 80.2 | 11.91 | 0.53 |
| 31/1/05-15 | 0.00123 | 0.00319 | 0.01520 | 3.87881 | 3.50205 | 90.6 | 17.60 | 0.51 |
| 31/1/05-16 | 0.00216 | 0.00256 | 0.01494 | 4.16342 | 3.51234 | 84.7 | 17.66 | 0.41 |
| 31/1/05-17 | 0.00713 | -0.00209 | 0.01860 | 5.06282 | 2.94099 | 58.3 | 14.80 | 1.25 |
| 31/1/05-18 | 0.00465 | -0.00027 | 0.01461 | 4.30357 | 2.91562 | 68.0 | 14.67 | 0.62 |
| 31/1/05-19 | 0.00315 | 0.00172 | 0.01391 | 4.00272 | 3.05916 | 76.7 | 15.39 | 0.48 |
| 31/1/05-20 | 0.00002 | 0.00122 | 0.01858 | 5.10201 | 5.08258 | 99.9 | 25.49 | 0.78 |
| 31/1/05-22 | 0.00081 | 0.00010 | 0.01456 | 15.65828 | 15.40358 | 98.5 | 76.18 | 1.90 |
| 31/1/05-23 | 0.00016 | -0.00305 | 0.01461 | 4.57385 | 4.51312 | 99.0 | 22.65 | 1.36 |
| 31/1/05-24 | 0.00128 | -0.00174 | 0.01458 | 4.09504 | 3.70185 | 90.7 | 18.60 | 0.99 |
| 31/1/05-25 | 0.00120 | -0.00022 | 0.01467 | 4.21045 | 3.84092 | 91.5 | 19.30 | 0.48 |
| 31/1/05-26 | 0.00990 | 0.00034 | 0.01698 | 8.12605 | 5.18721 | 63.9 | 26.01 | 0.69 |
| 31/1/05-27 | 0.00061 | 0.00199 | 0.01501 | 4.88323 | 4.68748 | 96.3 | 23.52 | 0.63 |
| 31/1/05-28 | 0.00321 | 0.00667 | 0.01598 | 4.87659 | 3.91487 | 80.5 | 19.67 | 0.77 |
| 31/1/05-29 | 0.00241 | -0.00015 | 0.01563 | 3.96030 | 3.23311 | 81.9 | 16.26 | 0.94 |
| 31/1/05-30 | 0.00564 | 0.00024 | 0.01410 | 5.39019 | 3.70950 | 69.0 | 18.64 | 0.75 |
| 31/1/05-31 | 0.00045 | 0.00621 | 0.01645 | 4.44383 | 4.29594 | 97.0 | 21.57 | 1.15 |
| 31/1/05-32 | 0.00297 | 0.00036 | 0.01593 | 5.31287 | 4.42071 | 83.4 | 22.19 | 0.56 |
| 31/1/05-33 | 0.00123 | 0.00438 | 0.01393 | 4.10767 | 3.72899 | 91.1 | 18.74 | 0.77 |
| 31/1/05-34 | 0.00028 | 0.00533 | 0.01454 | 3.61344 | 3.51676 | 97.7 | 17.68 | 0.68 |
| 31/1/05-35 | 0.00375 | 0.00829 | 0.01601 | 6.00546 | 4.88519 | 81.5 | 24.51 | 1.16 |
| 31/1/05-36 | 0.00236 | 0.01148 | 0.01573 | 2.59544 | 1.88565 | 73.1 | 9.50 | 1.20 |
| 31/1/05-37 | 0.00171 | -0.00104 | 0.01475 | 4.97308 | 4.45311 | 89.8 | 22.36 | 0.64 |
| 31/1/05-38 | 0.00444 | 0.00166 | 0.01575 | 6.77499 | 5.44798 | 80.6 | 27.31 | 0.70 |
| 31/1/05-40 | 0.00044 | 0.00355 | 0.01293 | 2.58689 | 2.44230 | 94.9 | 12.30 | 0.60 |
| 31/1/05-41 | 0.00020 | 0.00070 | 0.01569 | 4.23579 | 4.16324 | 98.6 | 20.91 | 0.79 |
| 31/1/05-42 | 0.00092 | -0.00016 | 0.01463 | 4.42499 | 4.13963 | 93.9 | 20.79 | 0.57 |
| 31/1/05-43 | 0.00110 | 0.00561 | 0.01474 | 4.23802 | 3.90049 | 92.3 | 19.60 | 0.64 |
| 31/1/05-44 | 0.00345 | 0.00081 | 0.01657 | 4.85084 | 3.81593 | 78.9 | 19.17 | 0.45 |
| 31/1/05-46 | 0.00025 | 0.00063 | 0.01445 | 15.43240 | 15.34432 | 99.5 | 75.89 | 1.69 |
| 31/1/05-47 | 0.00037 | -0.00559 | 0.01601 | 123.53423 | 123.40982 | 99.9 | 535.45 | 12.62 |
| 31/1/05-48 | 0.00024 | 0.00501 | 0.01696 | 3.16465 | 3.07954 | 97.8 | 15.49 | 0.85 |
| 31/1/05-49 | 0.00107 | 0.00704 | 0.01556 | 3.77879 | 3.44888 | 91.6 | 17.34 | 0.62 |
| 31/1/05-50 | 0.00077 | 0.00174 | 0.01429 | 3.72513 | 3.48476 | 93.9 | 17.52 | 0.65 |
| 31/1/05-51 | 0.00120 | 0.00216 | 0.01484 | 3.08189 | 2.71319 | 88.4 | 13.65 | 0.43 |
| 31/1/05-52 | 0.00116 | 0.00713 | 0.01486 | 3.43258 | 3.07565 | 90.0 | 15.47 | 0.70 |
| 31/1/05-54 | 0.00013 | 0.00007 | 0.01572 | 8.85466 | 8.80292 | 99.6 | 43.93 | 1.04 |
| 31/1/05-55 | 0.00030 | 0.00285 | 0.01622 | 5.25808 | 5.15407 | 98.3 | 25.85 | 1.10 |
| 31/1/05-56 | 0.00030 | 0.00083 | 0.01373 | 4.07300 | 3.97038 | 97.8 | 19.95 | 0.51 |
| 31/1/05-57 | 0.00311 | -0.00141 | 0.01516 | 4.89286 | 3.95919 | 81.2 | 19.89 | 0.82 |
| 31/1/05-58 | 0.00192 | -0.00074 | 0.01420 | 4.52711 | 3.94557 | 87.4 | 19.82 | 0.88 |
| 31/1/05-59 | 0.00371 | -0.00032 | 0.01348 | 3.03888 | 1.92788 | 63.7 | 9.71 | 0.62 |
| 31/1/05-60 | 0.00028 | 0.00072 | 0.01459 | 3.74355 | 3.64584 | 97.8 | 18.32 | 0.58 |
| 31/1/05-61 | 0.00113 | 0.00233 | 0.01623 | 2.19349 | 1.84533 | 84.7 | 9.30 | 0.38 |
| 31/1/05-62 | 0.00028 | 0.00871 | 0.01461 | 3.70967 | 3.61467 | 97.8 | 18.17 | 0.42 |
| 31/1/05-63 | 0.00596 | 0.01464 | 0.01449 | 4.80428 | 3.03151 | 63.3 | 15.25 | 1.33 |
| 31/1/05-64 | 0.00004 | -0.00029 | 0.01524 | 3.71568 | 3.69071 | 99.7 | 18.55 | 0.69 |
| 31/1/05-65 | 0.00133 | 0.00070 | 0.01417 | 2.59987 | 2.19233 | 84.8 | 11.04 | 0.32 |
| 31/1/05-66 | 0.00399 | 0.00925 | 0.01488 | 4.57516 | 3.38279 | 74.2 | 17.01 | 1.01 |
| 31/1/05-67 | 0.00077 | 0.00868 | 0.01393 | 2.73085 | 2.49036 | 91.7 | 12.54 | 0.62 |
| 31/1/05-69 | 0.00048 | 0.00990 | 0.02005 | 4.63034 | 4.47458 | 96.9 | 22.46 | 1.24 |
| 31/1/05-71 | 0.00057 | 0.00234 | 0.01436 | 4.03360 | 3.85179 | 95.8 | 19.35 | 0.54 |
| 31/1/05-72 | 0.00012 | 0.00171 | 0.01445 | 6.66402 | 6.61517 | 99.5 | 33.11 | 0.85 |
| 31/1/05-73 | 0.00047 | 0.00077 | 0.01455 | 3.76500 | 3.61215 | 96.3 | 18.15 | 0.64 |
| 31/1/05-74 | 0.00126 | 0.00552 | 0.01468 | 4.52477 | 4.13748 | 91.7 | 20.78 | 0.61 |
| 31/1/05-75 | 0.00139 | 0.00527 | 0.01468 | 3.90396 | 3.47855 | 89.4 | 17.49 | 0.53 |
| 31/1/05-76 | 0.00048 | 0.00379 | 0.01378 | 3.63584 | 3.47927 | 96.1 | 17.49 | 0.51 |
| 31/1/05-77 | 0.00023 | 0.00066 | 0.01729 | 3.76165 | 3.67873 | 98.2 | 18.49 | 0.55 |
| 31/1/05-78 | 0.00072 | 0.00372 | 0.01489 | 3.40227 | 3.17453 | 93.7 | 15.97 | 0.43 |
| 31/1/05-79 | 0.00258 | 0.03864 | 0.02192 | 32.47234 | 31.70020 | 97.7 | 153.42 | 75.24 |
| 31/1/05-80 | 0.00584 | 0.00710 | 0.01611 | 6.57559 | 4.83717 | 73.7 | 24.27 | 5.60 |
| 31/1/05-82 | 0.00027 | 0.00018 | 0.01572 | 3.55853 | 3.46510 | 97.8 | 17.42 | 0.54 |
| 31/1/05-83 | 0.00076 | 0.00192 | 0.01488 | 1.81350 | 1.57333 | 87.4 | 7.93 | 0.32 |
| 31/1/05-84 | 0.00430 | 0.00758 | 0.01426 | 3.42965 | 2.14506 | 62.8 | 10.80 | 0.81 |
| 31/1/05-85 | 0.00054 | 0.00481 | 0.01773 | 4.84227 | 4.66926 | 96.7 | 23.43 | 1.74 |
| 31/1/05-86 | 0.00157 | 0.00269 | 0.01610 | 4.39188 | 3.91269 | 89.4 | 19.66 | 0.67 |
| 31/1/05-87 | 0.00118 | 0.00729 | 0.01591 | 3.88871 | 3.52792 | 91.1 | 17.73 | 0.79 |
| 31/1/05-88 | 0.00152 | 0.00574 | 0.01518 | 5.36758 | 4.90330 | 91.6 | 24.60 | 0.97 |
| 31/1/05-89 | 0.00015 | -0.00179 | 0.01480 | 21.97990 | 21.92063 | 99.8 | 107.46 | 2.38 |
| 31/1/05-90 | 0.00124 | 0.00904 | 0.01478 | 6.85011 | 6.47173 | 94.7 | 32.40 | 1.17 |
| 31/1/05-92 | 0.00823 | -0.00003 | 0.01919 | 6.29138 | 3.84395 | 61.2 | 19.31 | 9.20 |
| 31/1/05-93 | 0.00666 | 0.00717 | 0.01852 | 8.70828 | 6.72671 | 77.4 | 33.66 | 4.57 |
| 31/1/05-94 | 0.00230 | -0.00604 | 0.01651 | 4.64583 | 3.95177 | 85.3 | 19.85 | 2.92 |
| 31/1/05-95 | 0.00037 | 0.00082 | 0.01313 | 3.69240 | 3.57000 | 97.1 | 17.94 | 0.49 |
| 31/1/05-96 | 0.00431 | 0.01062 | 0.01471 | 5.03841 | 3.75127 | 74.7 | 18.85 | 2.42 |
| 31/1/05-97 | 0.00025 | -0.00156 | 0.01494 | 6.34363 | 6.25492 | 98.8 | 31.32 | 3.01 |

**Table A8 Step-heating data**

| **MO9 177-250µm** | | |  |  |  |  |  |  |  |  |
| --- | --- | --- | --- | --- | --- | --- | --- | --- | --- | --- |
| Temp (°C) | 36/39 Cor | 37/39 Cor | 38/39 Cor | 40/39 Cor | 40*/39 | %40* | Ar39 Moles | cum 39Ar | Age (Ma) | 1 s.d. |
| 700 | 0.2567 | 0.0783 | 0.0880 | 86.6427 | 10.7397 | 12.4 | 7.43E-18 | 0.005 | 16.29 | 3.66 |
| 800 | 0.0032 | 0.0010 | 0.0123 | 4.8041 | 3.8174 | 80.3 | 5.67E-16 | 0.353 | 5.81 | 0.05 |
| 825 | 0.0000 | 0.0052 | 0.0118 | 3.9535 | 3.8999 | 99.9 | 1.68E-16 | 0.456 | 5.93 | 0.15 |
| 850 | 0.0173 | 0.0533 | 0.0148 | 8.2065 | 3.0577 | 37.5 | 2.17E-17 | 0.469 | 4.65 | 1.19 |
| 875 | 0.0002 | 0.0045 | 0.0115 | 3.8214 | 3.7239 | 98.7 | 1.77E-16 | 0.578 | 5.66 | 0.15 |
| 900 | 0.0019 | 0.0064 | 0.0122 | 3.8273 | 3.2249 | 85.4 | 1.49E-16 | 0.670 | 4.91 | 0.17 |
| 940 | 0.0004 | 0.0065 | 0.0113 | 3.8525 | 3.6711 | 96.5 | 1.35E-16 | 0.753 | 5.58 | 0.19 |
| 990 | 0.0043 | 0.0196 | 0.0123 | 4.8894 | 3.5582 | 73.5 | 3.52E-17 | 0.775 | 5.41 | 0.85 |
| 1050 | 0.0000 | 0.0071 | 0.0116 | 3.8991 | 3.8466 | 99.9 | 1.08E-16 | 0.841 | 5.85 | 0.24 |
| 1150 | 0.0002 | 0.0040 | 0.0124 | 3.9071 | 3.7937 | 98.3 | 2.58E-16 | 1.000 | 5.77 | 0.12 |
| 1350 | 1.3468 | 18.3658 | 0.1322 | 90.2486 | -310.1484 | -339.6 | 4.87E-19 | 1.000 | -547.8 | 103.0 |
|  |  |  |  |  |  |  |  |  |  |  |
|  |  |  |  |  |  |  |  |  |  |  |
|  |  |  |  |  |  |  |  |  |  |  |
| **MO15 177-250µm** | | |  |  |  |  |  |  |  |  |
| Temp (°C) | 36/39 Cor | 37/39 Cor | 38/39 Cor | 40/39 Cor | 40*/39 | %40* | Ar39 Moles | cum 39Ar | Age (Ma) | 1 s.d. |
| 700 | 0.1847 | 0.0393 | 0.0871 | 63.5054 | 8.8904 | 14.0 | 1.92E-17 | 0.012 | 13.49 | 2.01 |
| 800 | 0.0019 | 0.0020 | 0.0120 | 4.6072 | 4.0022 | 87.8 | 3.85E-16 | 0.243 | 6.09 | 0.08 |
| 825 | 0.0019 | 0.0037 | 0.0112 | 3.6279 | 3.0239 | 84.5 | 2.08E-16 | 0.368 | 4.60 | 0.14 |
| 850 | 0.0006 | 0.0057 | 0.0109 | 3.7019 | 3.4866 | 95.5 | 1.83E-16 | 0.478 | 5.30 | 0.15 |
| 875 | 0.0010 | 0.0057 | 0.0112 | 3.6326 | 3.2973 | 92.0 | 1.72E-16 | 0.582 | 5.02 | 0.15 |
| 900 | 0.0002 | 0.0101 | 0.0109 | 3.7397 | 3.6219 | 98.2 | 1.30E-16 | 0.660 | 5.51 | 0.20 |
| 940 | 0.0012 | 0.0093 | 0.0115 | 3.9676 | 3.5565 | 90.8 | 1.19E-16 | 0.731 | 5.41 | 0.24 |
| 990 | 0.0282 | 0.5289 | 0.0275 | 26.6566 | 18.3367 | 68.9 | 2.52E-18 | 0.733 | 27.72 | 10.53 |
| 1050 | 0.0012 | 0.0094 | 0.0118 | 3.8530 | 3.4486 | 90.7 | 1.06E-16 | 0.797 | 5.25 | 0.26 |
| 1150 | 0.0016 | 0.0025 | 0.0118 | 3.9362 | 3.4222 | 88.0 | 2.43E-16 | 0.943 | 5.21 | 0.13 |
| 1350 | 0.0007 | 0.0090 | 0.0117 | 5.1576 | 4.9043 | 96.0 | 9.53E-17 | 1.000 | 7.46 | 0.28 |
|  |  |  |  |  |  |  |  |  |  |  |
|  |  |  |  |  |  |  |  |  |  |  |
|  |  |  |  |  |  |  |  |  |  |  |
| **MO29 177-250µm** | | |  |  |  |  |  |  |  |  |
| Temp (°C) | 36/39 Cor | 37/39 Cor | 38/39 Cor | 40/39 Cor | 40*/39 | %40* | Ar39 Moles | cum 39Ar | Age (Ma) | 1 s.d. |
| 650 | 0.0591 | 0.0337 | 0.1003 | 46.3774 | 28.8662 | 62.3 | 4.63E-17 | 0.017 | 43.45 | 0.65 |
| 725 | 0.0095 | 0.0118 | 0.0228 | 19.5082 | 16.6602 | 85.6 | 7.95E-17 | 0.045 | 25.20 | 0.38 |
| 775 | 0.0059 | 0.0087 | 0.0154 | 11.5640 | 9.7742 | 84.9 | 1.15E-16 | 0.086 | 14.83 | 0.27 |
| 810 | 0.0208 | 0.0163 | 0.0168 | 11.7456 | 5.5628 | 47.6 | 5.41E-17 | 0.105 | 8.45 | 0.50 |
| 840 | 0.0005 | 0.0007 | 0.0116 | 5.5412 | 5.3422 | 97.3 | 8.78E-16 | 0.418 | 8.12 | 0.05 |
| 870 | 0.0006 | 0.0015 | 0.0115 | 5.5878 | 5.3630 | 96.8 | 6.02E-16 | 0.633 | 8.15 | 0.06 |
| 900 | 0.1325 | 0.5850 | 0.0401 | 38.3699 | -0.7881 | -2.1 | 2.94E-18 | 0.634 | -1.20 | 9.60 |
| 930 | 0.0017 | 0.0041 | 0.0117 | 7.1889 | 6.6509 | 93.2 | 2.02E-16 | 0.706 | 10.10 | 0.13 |
| 960 | 0.0026 | 0.0051 | 0.0123 | 8.1265 | 7.2995 | 90.4 | 1.33E-16 | 0.753 | 11.09 | 0.21 |
| 990 | 0.0020 | 0.0080 | 0.0124 | 9.4678 | 8.8375 | 93.8 | 9.37E-17 | 0.786 | 13.41 | 0.32 |
| 1030 | 0.1511 | 1.2290 | 0.0341 | 42.9855 | -1.6243 | -3.8 | 8.81E-19 | 0.787 | -2.48 | 29.93 |
| 1070 | 0.0010 | 0.0074 | 0.0138 | 13.3682 | 13.0250 | 97.8 | 9.59E-17 | 0.821 | 19.73 | 0.33 |
| 1120 | 0.0001 | 0.0027 | 0.0131 | 12.3653 | 12.2794 | 99.7 | 1.91E-16 | 0.889 | 18.61 | 0.18 |
| 1200 | 0.0023 | 0.0016 | 0.0134 | 13.1153 | 12.3910 | 94.8 | 2.24E-16 | 0.969 | 18.78 | 0.15 |
| 1350 | 0.0026 | 0.0048 | 0.0164 | 24.4401 | 23.6315 | 96.9 | 8.73E-17 | 1.000 | 35.64 | 0.41 |
|  |  |  |  |  |  |  |  |  |  |  |
|  |  |  |  |  |  |  |  |  |  |  |
|  |  |  |  |  |  |  |  |  |  |  |
| **MO50 177-250µm** | | |  |  |  |  |  |  |  |  |
| Temp (°C) | 36/39 Cor | 37/39 Cor | 38/39 Cor | 40/39 Cor | 40*/39 | %40* | Ar39 Moles | cum 39Ar | Age (Ma) | 1 s.d. |
| 500 | 4.0325 | -7.3686 | 6.8375 | 992.475 | -197.82 | -20.1 | 1.61E-19 | 0.000 | -1393.4 | 9318.9 |
| 600 | 0.3240 | -0.2983 | 0.5512 | 77.9596 | -17.823 | -22.9 | 2.50E-18 | 0.001 | -89.65 | 267.44 |
| 750 | 0.0168 | 0.0402 | 0.0380 | 8.8075 | 3.8208 | 43.4 | 2.61E-17 | 0.012 | 18.65 | 24.05 |
| 950 | 0.0000 | 0.0178 | 0.0156 | 1.6300 | 1.6175 | 100.1 | 1.22E-15 | 0.516 | 7.92 | 0.56 |
| 1050 | 0.0000 | 0.0920 | 0.0167 | 1.4313 | 1.4265 | 100.7 | 4.19E-16 | 0.688 | 6.99 | 1.53 |
| 1150 | 0.0017 | 0.0686 | 0.0162 | 1.7745 | 1.2758 | 72.5 | 2.14E-16 | 0.777 | 6.25 | 2.97 |
| 1250 | 0.0012 | 0.0167 | 0.0175 | 2.4043 | 2.0475 | 85.7 | 3.51E-16 | 0.922 | 10.02 | 1.85 |
| 1400 | 0.0177 | 0.0431 | 0.0194 | 6.3982 | 1.1635 | 18.2 | 1.52E-16 | 0.985 | 5.70 | 4.43 |
| 1500 | 0.2377 | 0.0000 | 0.0668 | 74.3333 | 4.0730 | 5.5 | 3.76E-17 | 1.000 | 19.88 | 19.18 |
|  |  |  |  |  |  |  |  |  |  |  |
|  |  |  |  |  |  |  |  |  |  |  |
|  |  |  |  |  |  |  |  |  |  |  |
| **MO50 125-177 µm** | | |  |  |  |  |  |  |  |  |
| Temp (°C) | 36/39 Cor | 37/39 Cor | 38/39 Cor | 40/39 Cor | 40*/39 | %40* | Ar39 Moles | cum 39Ar | Age (Ma) | 1 s.d. |
| 500 | 0.0338 | -1.7665 | 1.2070 | 68.1236 | 57.7951 | 85.1 | 7.60E-19 | 0.000 | 263.4 | 734.9 |
| 600 | 0.1297 | -0.2056 | 0.3428 | 43.2684 | 4.8951 | 11.3 | 5.77E-18 | 0.001 | 23.86 | 108.8 |
| 750 | 0.0217 | 0.0232 | 0.0234 | 9.3912 | 2.9605 | 31.6 | 7.28E-17 | 0.015 | 14.47 | 8.67 |
| 950 | 0.0002 | 0.0106 | 0.0143 | 1.5300 | 1.4623 | 96.5 | 2.67E-15 | 0.511 | 7.16 | 0.29 |
| 1050 | 0.0005 | 0.0311 | 0.0150 | 1.6073 | 1.4381 | 90.3 | 1.17E-15 | 0.729 | 7.04 | 0.56 |
| 1150 | 0.0051 | 0.0225 | 0.0163 | 2.9919 | 1.4719 | 49.4 | 4.28E-16 | 0.809 | 7.21 | 1.50 |
| 1300 | 0.0050 | 0.0105 | 0.0159 | 3.3340 | 1.8378 | 55.4 | 8.03E-16 | 0.958 | 9.00 | 0.84 |
| 1500 | 0.0317 | 0.0001 | 0.0223 | 12.1852 | 2.8075 | 23.1 | 2.26E-16 | 1.000 | 13.72 | 3.17 |
| 1650 | 6.4318 | -2.9892 | 1.1997 | 2034.67 | 133.1828 | 6.6 | 7.38E-19 | 1.000 | 557.7 | 759.5 |
|  |  |  |  |  |  |  |  |  |  |  |
|  |  |  |  |  |  |  |  |  |  |  |
|  |  |  |  |  |  |  |  |  |  |  |
| **MO82 177-250µm** | | |  |  |  |  |  |  |  |  |
| Temp (°C) | 36/39 Cor | 37/39 Cor | 38/39 Cor | 40/39 Cor | 40*/39 | %40* | Ar39 Moles | cum 39Ar | Age (Ma) | 1 s.d. |
| 700 | 0.6002 | 0.0706 | 0.1279 | 80.1900 | -97.1961 | -121.2 | 1.87E-18 | 0.003 | -239.69 | 13.29 |
| 800 | 0.0133 | 0.0048 | 0.0147 | 7.5614 | 3.6261 | 48.1 | 3.41E-17 | 0.064 | 8.35 | 0.40 |
| 900 | 0.0013 | 0.0003 | 0.0124 | 3.7524 | 3.3367 | 89.4 | 3.27E-16 | 0.644 | 7.69 | 0.30 |
| 950 | 0.0020 | 0.0007 | 0.0125 | 4.1042 | 3.5050 | 85.8 | 5.37E-17 | 0.740 | 8.08 | 0.36 |
| 1000 | 0.0046 | 0.0008 | 0.0128 | 4.7250 | 3.3454 | 71.1 | 2.34E-17 | 0.781 | 7.71 | 0.45 |
| 1050 | 0.0055 | 0.0016 | 0.0130 | 5.0313 | 3.3874 | 67.6 | 1.93E-17 | 0.816 | 7.81 | 0.53 |
| 1100 | 0.0052 | 0.0020 | 0.0128 | 4.8156 | 3.2464 | 67.7 | 1.96E-17 | 0.850 | 7.48 | 0.50 |
| 1150 | 0.0009 | 0.0009 | 0.0119 | 3.8061 | 3.5320 | 93.3 | 2.90E-17 | 0.902 | 8.14 | 0.44 |
| 1200 | 0.0002 | 0.0009 | 0.0116 | 3.6096 | 3.5301 | 98.3 | 2.86E-17 | 0.953 | 8.13 | 0.42 |
| 1250 | 0.0022 | 0.0022 | 0.0130 | 4.4673 | 3.8001 | 85.4 | 1.16E-17 | 0.973 | 8.75 | 0.79 |
| 1300 | 0.0029 | 0.0019 | 0.0149 | 7.7771 | 6.8949 | 88.9 | 6.94E-18 | 0.986 | 15.85 | 1.41 |
| 1350 | -0.0012 | -0.0012 | 0.0131 | 7.6622 | 8.0030 | 104.7 | 8.06E-18 | 1.000 | 18.39 | 1.38 |
|  |  |  |  |  |  |  |  |  |  |  |
|  |  |  |  |  |  |  |  |  |  |  |
|  |  |  |  |  |  |  |  |  |  |  |
| **MO139 177-250µm** | | |  |  |  |  |  |  |  |  |
| Temp (°C) | 36/39 Cor | 37/39 Cor | 38/39 Cor | 40/39 Cor | 40*/39 | %40* | Ar39 Moles | cum 39Ar | Age (Ma) | 1 s.d. |
| 850 | 0.0126 | 0.0768 | 0.0299 | 8.5108 | 4.7960 | 56.4 | 2.96E-16 | 0.049 | 23.47 | 2.21 |
| 900 | 0.0000 | 0.0000 | 0.0148 | 0.7156 | 0.7012 | 100.0 | 1.53E-16 | 0.074 | 3.45 | 4.15 |
| 950 | 0.0000 | 0.0012 | 0.0156 | 2.2720 | 2.2578 | 100.0 | 1.68E-15 | 0.352 | 11.09 | 0.46 |
| 1000 | 0.0000 | 0.0016 | 0.0147 | 2.4603 | 2.4462 | 100.0 | 1.66E-15 | 0.627 | 12.01 | 0.47 |
| 1050 | 0.0000 | 0.0028 | 0.0146 | 1.4316 | 1.4175 | 100.0 | 3.83E-16 | 0.690 | 6.97 | 1.67 |
| 1150 | 0.0000 | 0.0005 | 0.0164 | 2.1729 | 2.1586 | 100.0 | 5.05E-16 | 0.774 | 10.60 | 1.28 |
| 1250 | 0.0000 | 0.0008 | 0.0164 | 2.7200 | 2.7057 | 100.0 | 9.32E-16 | 0.928 | 13.28 | 0.75 |
| 1350 | 0.0000 | 0.0000 | 0.0188 | 3.5587 | 3.5444 | 100.0 | 2.75E-16 | 0.974 | 17.37 | 2.47 |
| 1500 | 0.0000 | 0.0000 | 0.0153 | 4.1947 | 4.1804 | 100.0 | 1.58E-16 | 1.000 | 20.47 | 4.53 |
|  |  |  |  |  |  |  |  |  |  |  |
|  |  |  |  |  |  |  |  |  |  |  |
|  |  |  |  |  |  |  |  |  |  |  |
| **MO139 125-177 µm** | | |  |  |  |  |  |  |  |  |
| Temp (°C) | 36/39 Cor | 37/39 Cor | 38/39 Cor | 40/39 Cor | 40*/39 | %40* | Ar39 Moles | cum 39Ar | Age (Ma) | 1 s.d. |
| 850 | 0.0084 | 0.2141 | 0.0288 | 10.5371 | 8.0643 | 76.6 | 2.66E-16 | 0.070 | 39.14 | 2.58 |
| 900 | 0.0000 | 0.0433 | 0.0127 | 1.1008 | 1.0909 | 100.4 | 2.49E-16 | 0.135 | 5.35 | 2.55 |
| 950 | 0.0000 | 0.0200 | 0.0135 | 2.1184 | 2.1062 | 100.1 | 9.42E-16 | 0.381 | 10.34 | 0.73 |
| 1000 | 0.0000 | 0.0216 | 0.0149 | 1.9010 | 1.8889 | 100.1 | 6.62E-16 | 0.554 | 9.25 | 0.98 |
| 1050 | 0.0000 | 0.0405 | 0.0149 | 1.1761 | 1.1659 | 100.4 | 2.70E-16 | 0.625 | 5.73 | 2.37 |
| 1150 | 0.0000 | 0.0154 | 0.0135 | 1.9318 | 1.9191 | 100.1 | 5.14E-16 | 0.759 | 9.39 | 1.26 |
| 1250 | 0.0000 | 0.0270 | 0.0150 | 3.7503 | 3.7388 | 100.1 | 5.87E-16 | 0.913 | 18.25 | 1.18 |
| 1350 | 0.0000 | 0.0307 | 0.0141 | 5.8183 | 5.8073 | 100.1 | 2.39E-16 | 0.975 | 28.27 | 2.84 |
| 1500 | 0.0000 | 0.0986 | 0.0137 | 12.5691 | 12.5665 | 100.1 | 9.47E-17 | 1.000 | 60.63 | 7.40 |
|  |  |  |  |  |  |  |  |  |  |  |
|  |  |  |  |  |  |  |  |  |  |  |
|  |  |  |  |  |  |  |  |  |  |  |
| **MO217 177-250µm** | | |  |  |  |  |  |  |  |  |
| Temp (°C) | 36/39 Cor | 37/39 Cor | 38/39 Cor | 40/39 Cor | 40*/39 | %40* | Ar39 Moles | cum 39Ar | Age (Ma) | 1 s.d. |
| 850 | 0.0119 | 1.4727 | 0.0424 | 16.6140 | 13.2708 | 79.8 | 1.98E-16 | 0.052 | 63.97 | 3.43 |
| 900 | 0.0000 | 0.0164 | 0.0161 | 2.5326 | 2.5199 | 100.1 | 2.77E-16 | 0.125 | 12.32 | 2.29 |
| 950 | 0.0000 | 0.0032 | 0.0155 | 3.8573 | 3.8433 | 100.0 | 6.17E-16 | 0.288 | 18.76 | 1.10 |
| 1000 | 0.0000 | 0.0040 | 0.0158 | 4.6703 | 4.6564 | 100.0 | 1.25E-15 | 0.617 | 23.29 | 0.75 |
| 1050 | 0.0000 | 0.0027 | 0.0171 | 3.5578 | 3.5437 | 100.0 | 2.21E-16 | 0.676 | 17.75 | 2.95 |
| 1150 | 0.0000 | 0.0035 | 0.0171 | 3.9655 | 3.9515 | 100.0 | 4.22E-16 | 0.787 | 19.29 | 1.57 |
| 1250 | 0.0000 | 0.0084 | 0.0208 | 7.4889 | 7.4755 | 100.0 | 4.85E-16 | 0.915 | 36.32 | 1.59 |
| 1350 | 0.0000 | 0.0156 | 0.0158 | 11.1080 | 11.0955 | 100.0 | 2.16E-16 | 0.972 | 53.64 | 3.33 |
| 1500 | 0.0069 | 0.0163 | 0.0177 | 22.9627 | 20.9086 | 91.1 | 1.08E-16 | 1.000 | 99.79 | 6.80 |
|  |  |  |  |  |  |  |  |  |  |  |
|  |  |  |  |  |  |  |  |  |  |  |
|  |  |  |  |  |  |  |  |  |  |  |
| **MO217 125-177 µm** | | |  |  |  |  |  |  |  |  |
| Temp (°C) | 36/39 Cor | 37/39 Cor | 38/39 Cor | 40/39 Cor | 40*/39 | %40* | Ar39 Moles | cum 39Ar | Age (Ma) | 1 s.d. |
| 850 | 0.0143 | 0.4652 | 0.0392 | 14.6987 | 10.5185 | 71.6 | 1.68E-16 | 0.053 | 50.89 | 4.08 |
| 900 | 0.0000 | 0.0028 | 0.0149 | 4.4128 | 4.3988 | 100.0 | 2.39E-16 | 0.128 | 21.46 | 2.68 |
| 950 | 0.0000 | 0.0008 | 0.0176 | 4.4013 | 4.3870 | 100.0 | 6.01E-16 | 0.316 | 22.18 | 1.23 |
| 1050 | 0.0000 | 0.0011 | 0.0150 | 4.7463 | 4.7320 | 100.0 | 1.20E-15 | 0.693 | 23.07 | 0.75 |
| 1150 | 0.0005 | 0.0000 | 0.0169 | 6.0093 | 5.8498 | 97.6 | 5.32E-16 | 0.859 | 28.48 | 1.61 |
| 1250 | 0.0044 | 0.0019 | 0.0153 | 8.5153 | 7.1966 | 84.7 | 3.21E-16 | 0.960 | 34.97 | 2.16 |
| 1350 | 0.0074 | 0.0000 | 0.0166 | 10.3570 | 8.1498 | 78.8 | 8.89E-17 | 0.988 | 39.55 | 7.35 |
| 1500 | 0.0377 | 0.0063 | 0.0240 | 23.5688 | 12.4087 | 52.7 | 3.87E-17 | 1.000 | 59.89 | 17.84 |
| 1650 | 51.1983 | 0.0053 | 7.5378 | 16824.2 | 1695.13 | 10.1 | 2.48E-20 | 1.000 | 3111 | 17841 |

**Part 2: Criteria for sample inclusion**

As noted by Ruhl and Hodges (2005), the shape of these normalized hypsometric curves and related normalized age distributions are highly sensitive to the range of the data. Therefore it is important to assess the quality of the data used to define the ranges of our age distributions. Ruhl and Hodges (2005) chose to exclude data from analysis such that the range “comprised 99% of the area under the cooling age [curve] and … the assigned [range] minimizes the mismatch between the shapes of the discretized *t** and *z** curves.” This seems to us to be a circular approach given that the match between the shapes of the curves is to be used to analyze whether or not the assumptions discussed above are reasonable for a given location.

We used a different approach for assigning the range to be used in analysis of each age distribution. Our concerns regarding whether or not a measured age should be used in our analysis are of two types. The first is the quality of the individual age; the second is the geologic reasonableness of the age.

In similar studies, Brewer *et al*. (2003, 2006) chose to exclude from consideration in their modeling and interpretation any muscovite ages that had a radiogenic yield less than 40% (*i.e*., 40Ar* = ((40Armeas — 295.5 x36Armeas)/ 40Armeas)<0.4). No detailed justification for this was given in Brewer *et al*. (2003, 2006) but Brewer (2005) suggested ages with 40Ar* less than 40% could be due to incomplete melting during heating, impure muscovite, or very young ages and suggested that the 40% cutoff was used to eliminate “spurious data.” It is, of course, always important to scrutinize one’s data for problems but we don’t think radiogenic yield is a good criterion to identify “spurious” data, especially in the Himalaya, where young ages have been widely reported. The 40% radiogenic filter had the effect of filtering out young ages (even those that might be analytically impeccable), therefore making the age distributions narrower and apparently the manifestation of more-even and slower erosion. An example of the utility of low 40Ar* samples comes from Huntington and Hodges (2006) who reported and used in their interpretation a 40Ar/39Ar muscovite age spectrum from within the Nyadi Khola drainage with an age of 2.5±0.2 Ma and a radiogenic yield of 29% overall and 38% for the reported plateau.

We think a better way to identify “bad data” would be to look for anomalously high 36Ar values (possible hydrocarbon contamination) or very high uncertainties in the age (such would be automatically de-emphasized on the probability distribution diagrams but could be a significant concern in calculation of *t**, which does not consider uncertainties). In our presentations of the standard probability density functions for the range of ages (Figure 3), we include all data from Brewer *et al*. (2003, 2006) that have reported 40Ar* greater than zero (as we do with the new data reported here). For the *t** calculations (Figure 6) we excluded any age that had a 1 uncertainty that was greater than 50% of the nominal age. This generally had the effect of removing younger ages from our analysis, as it is generally harder to make a precise analysis as the age of a sample decreases. However, if a young age did not exceed this exclusion criterion (*e.g*., 3.0±1.0 Ma), such ages were used in the definition of the range of ages. In our six age distributions, this criterion led to the exclusion of between 0 and 5.7 % of the data.

As discussed above, several of our samples represent drainage basins that contain a significant proportion of the Lesser Himalayan Sequence (Figure 1). Previous thermochronology from bedrock samples of the LHS have shown that muscovites do not always yield ages that are unambiguously associated with Himalayan orogenesis (*e.g*, Copeland *et al*., 1991; Herman *et al*., 2010; Wobus *et al*., 2003). Based on a review of muscovite ages from the Greater Himalayan Sequence (Copeland *et al*., 1991; Coleman and Hodges, 1995, 1998; Huntington and Hodges, 2006; Vannay and Hodges, 1996; Herman *et al*., 2010; Godin *et al*., 2001, 2006)—a group of rocks that seems to have been profoundly affected by Himalayan orogeny—we have chosen to exclude muscovite ages greater than 24 Ma from consideration when calculating *t**. We interpret ages older than 24 Ma to be muscovites from the LHS that have not been completely degassed during Himalayan metamorphism. Using this upper bound on acceptable ages had a profound effect on some samples (*e.g*., dropping *t*max from 535 Ma to 23.5 Ma and excluding 18 of 204 ages from sample NAG-12) to no effect on sample MO-50 where the oldest of 192 ages is 16.4 Ma.
